# Supplementary material
Source: PubMed Central journal article supplement (PMC4492989)

Fig 1c

pri-miR-122 (intron probe)

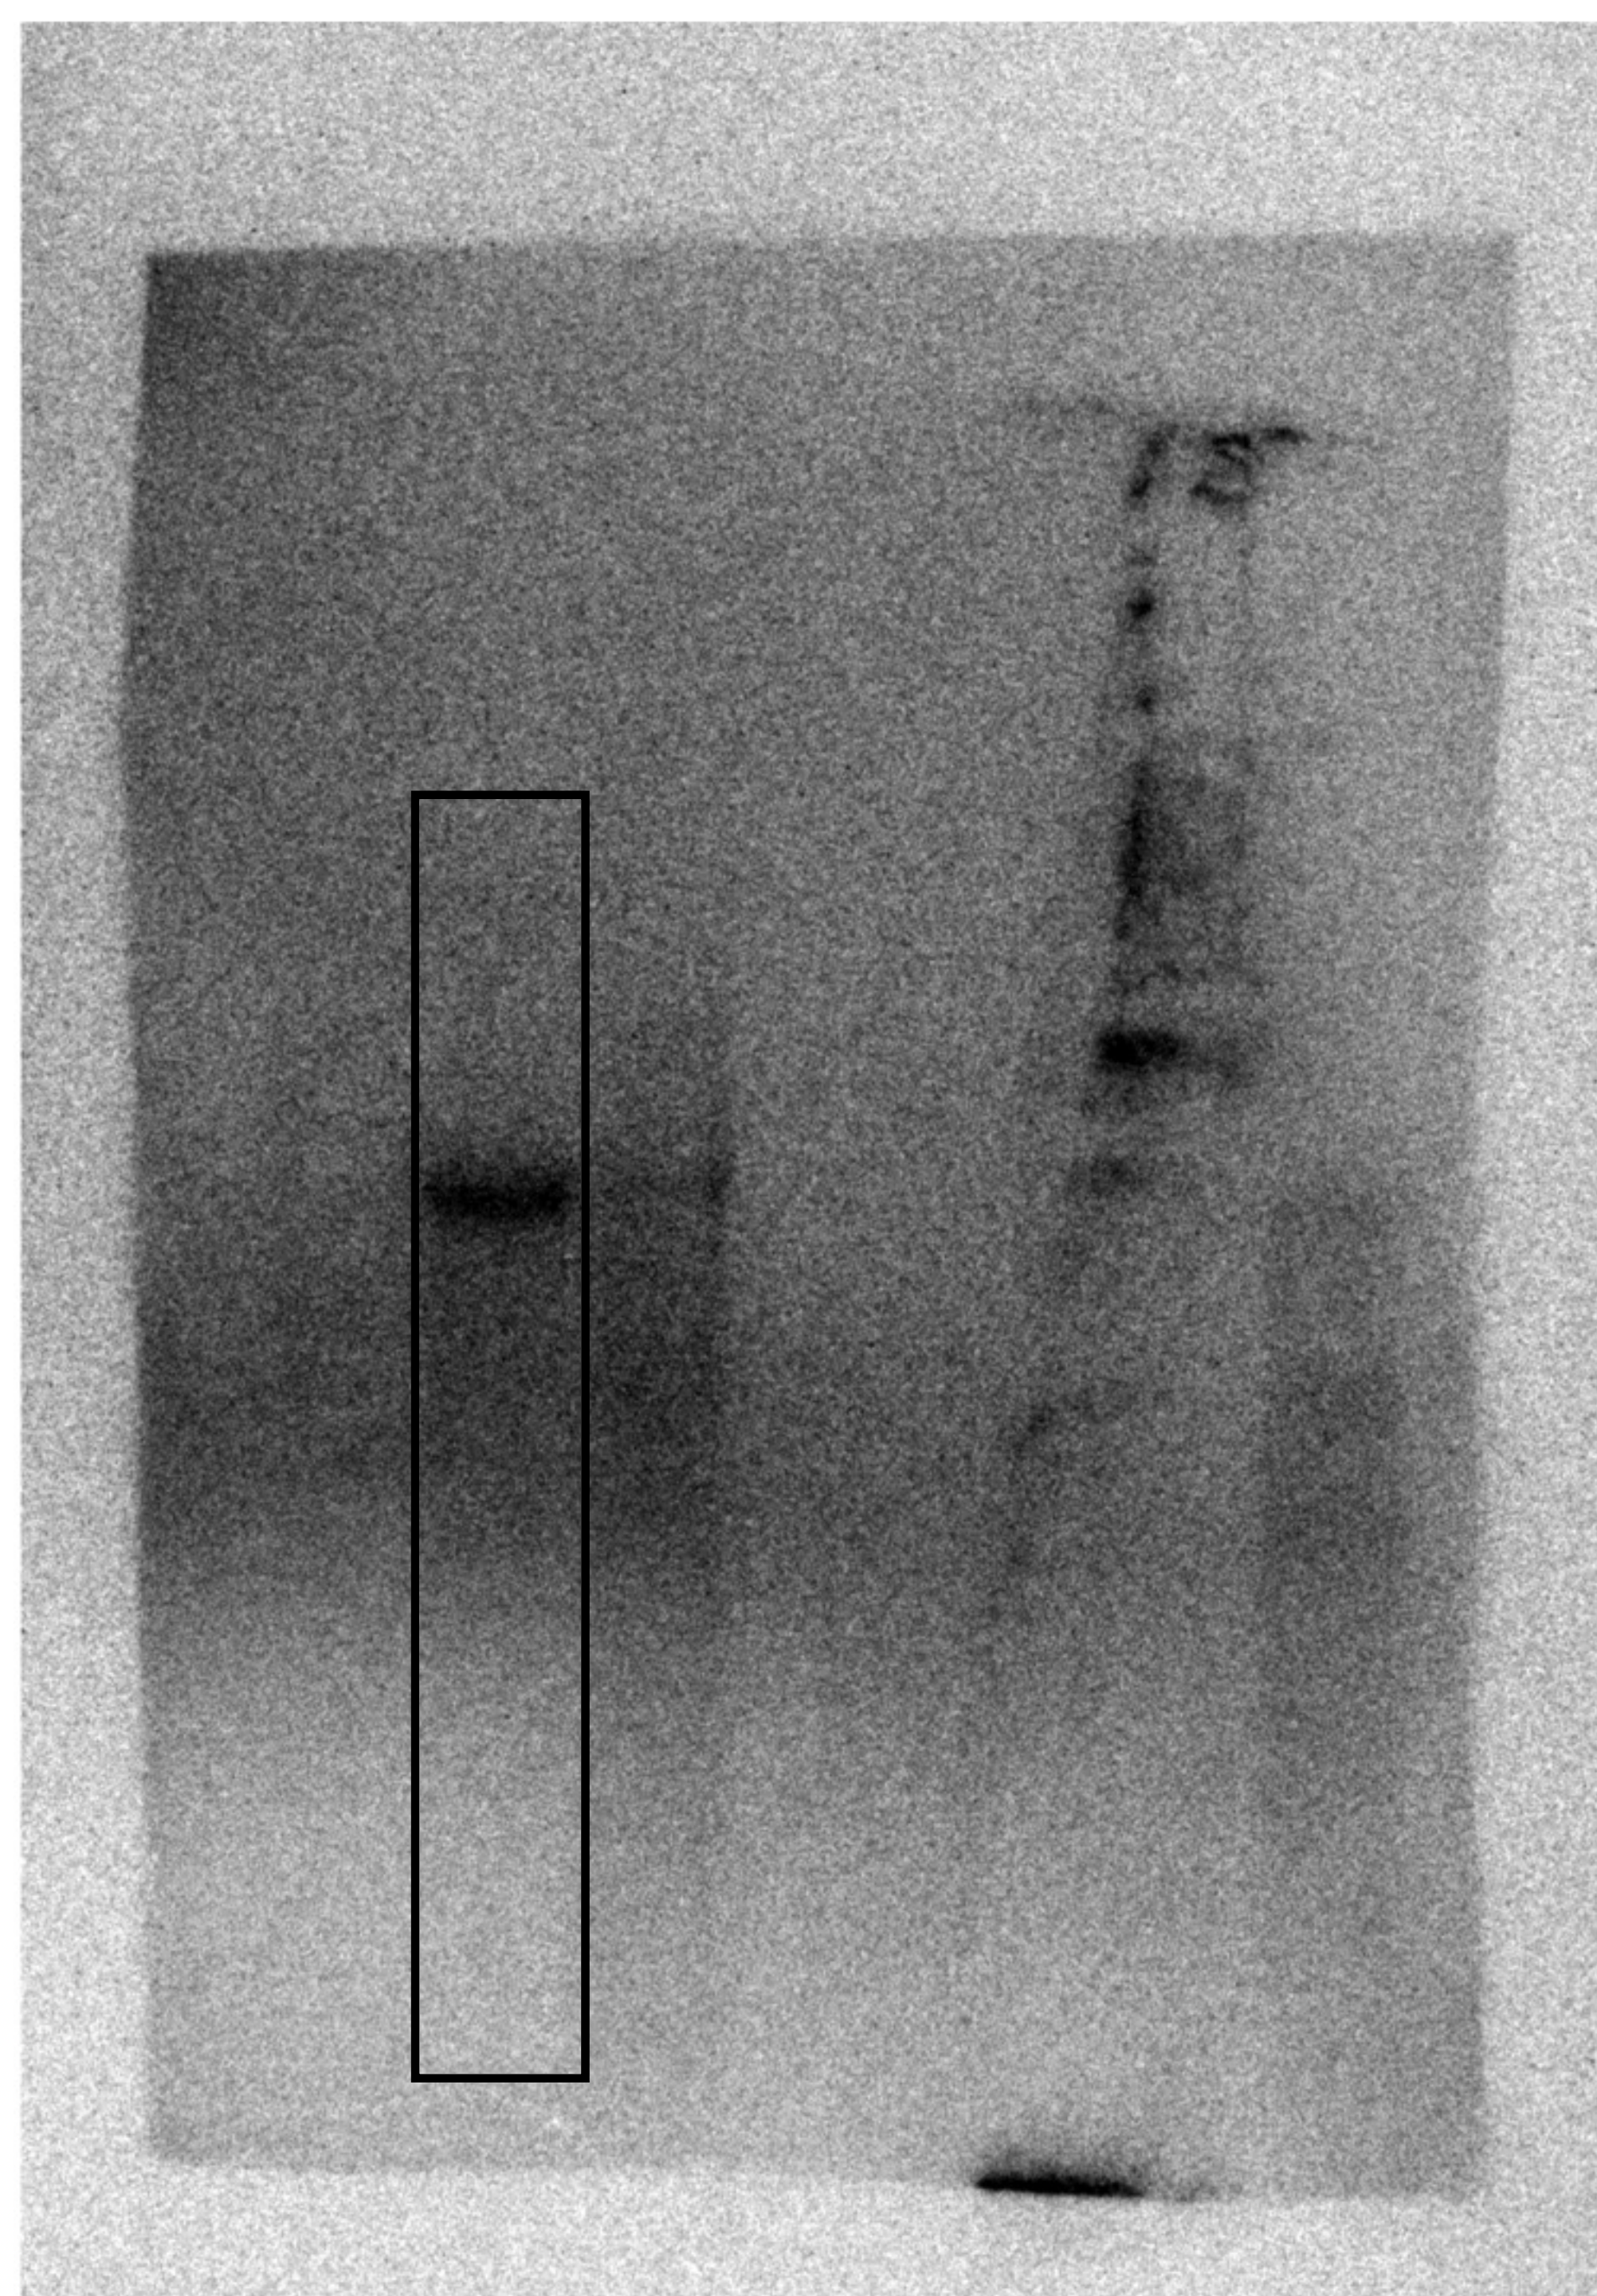

Pri-miR-122 (exon probe)

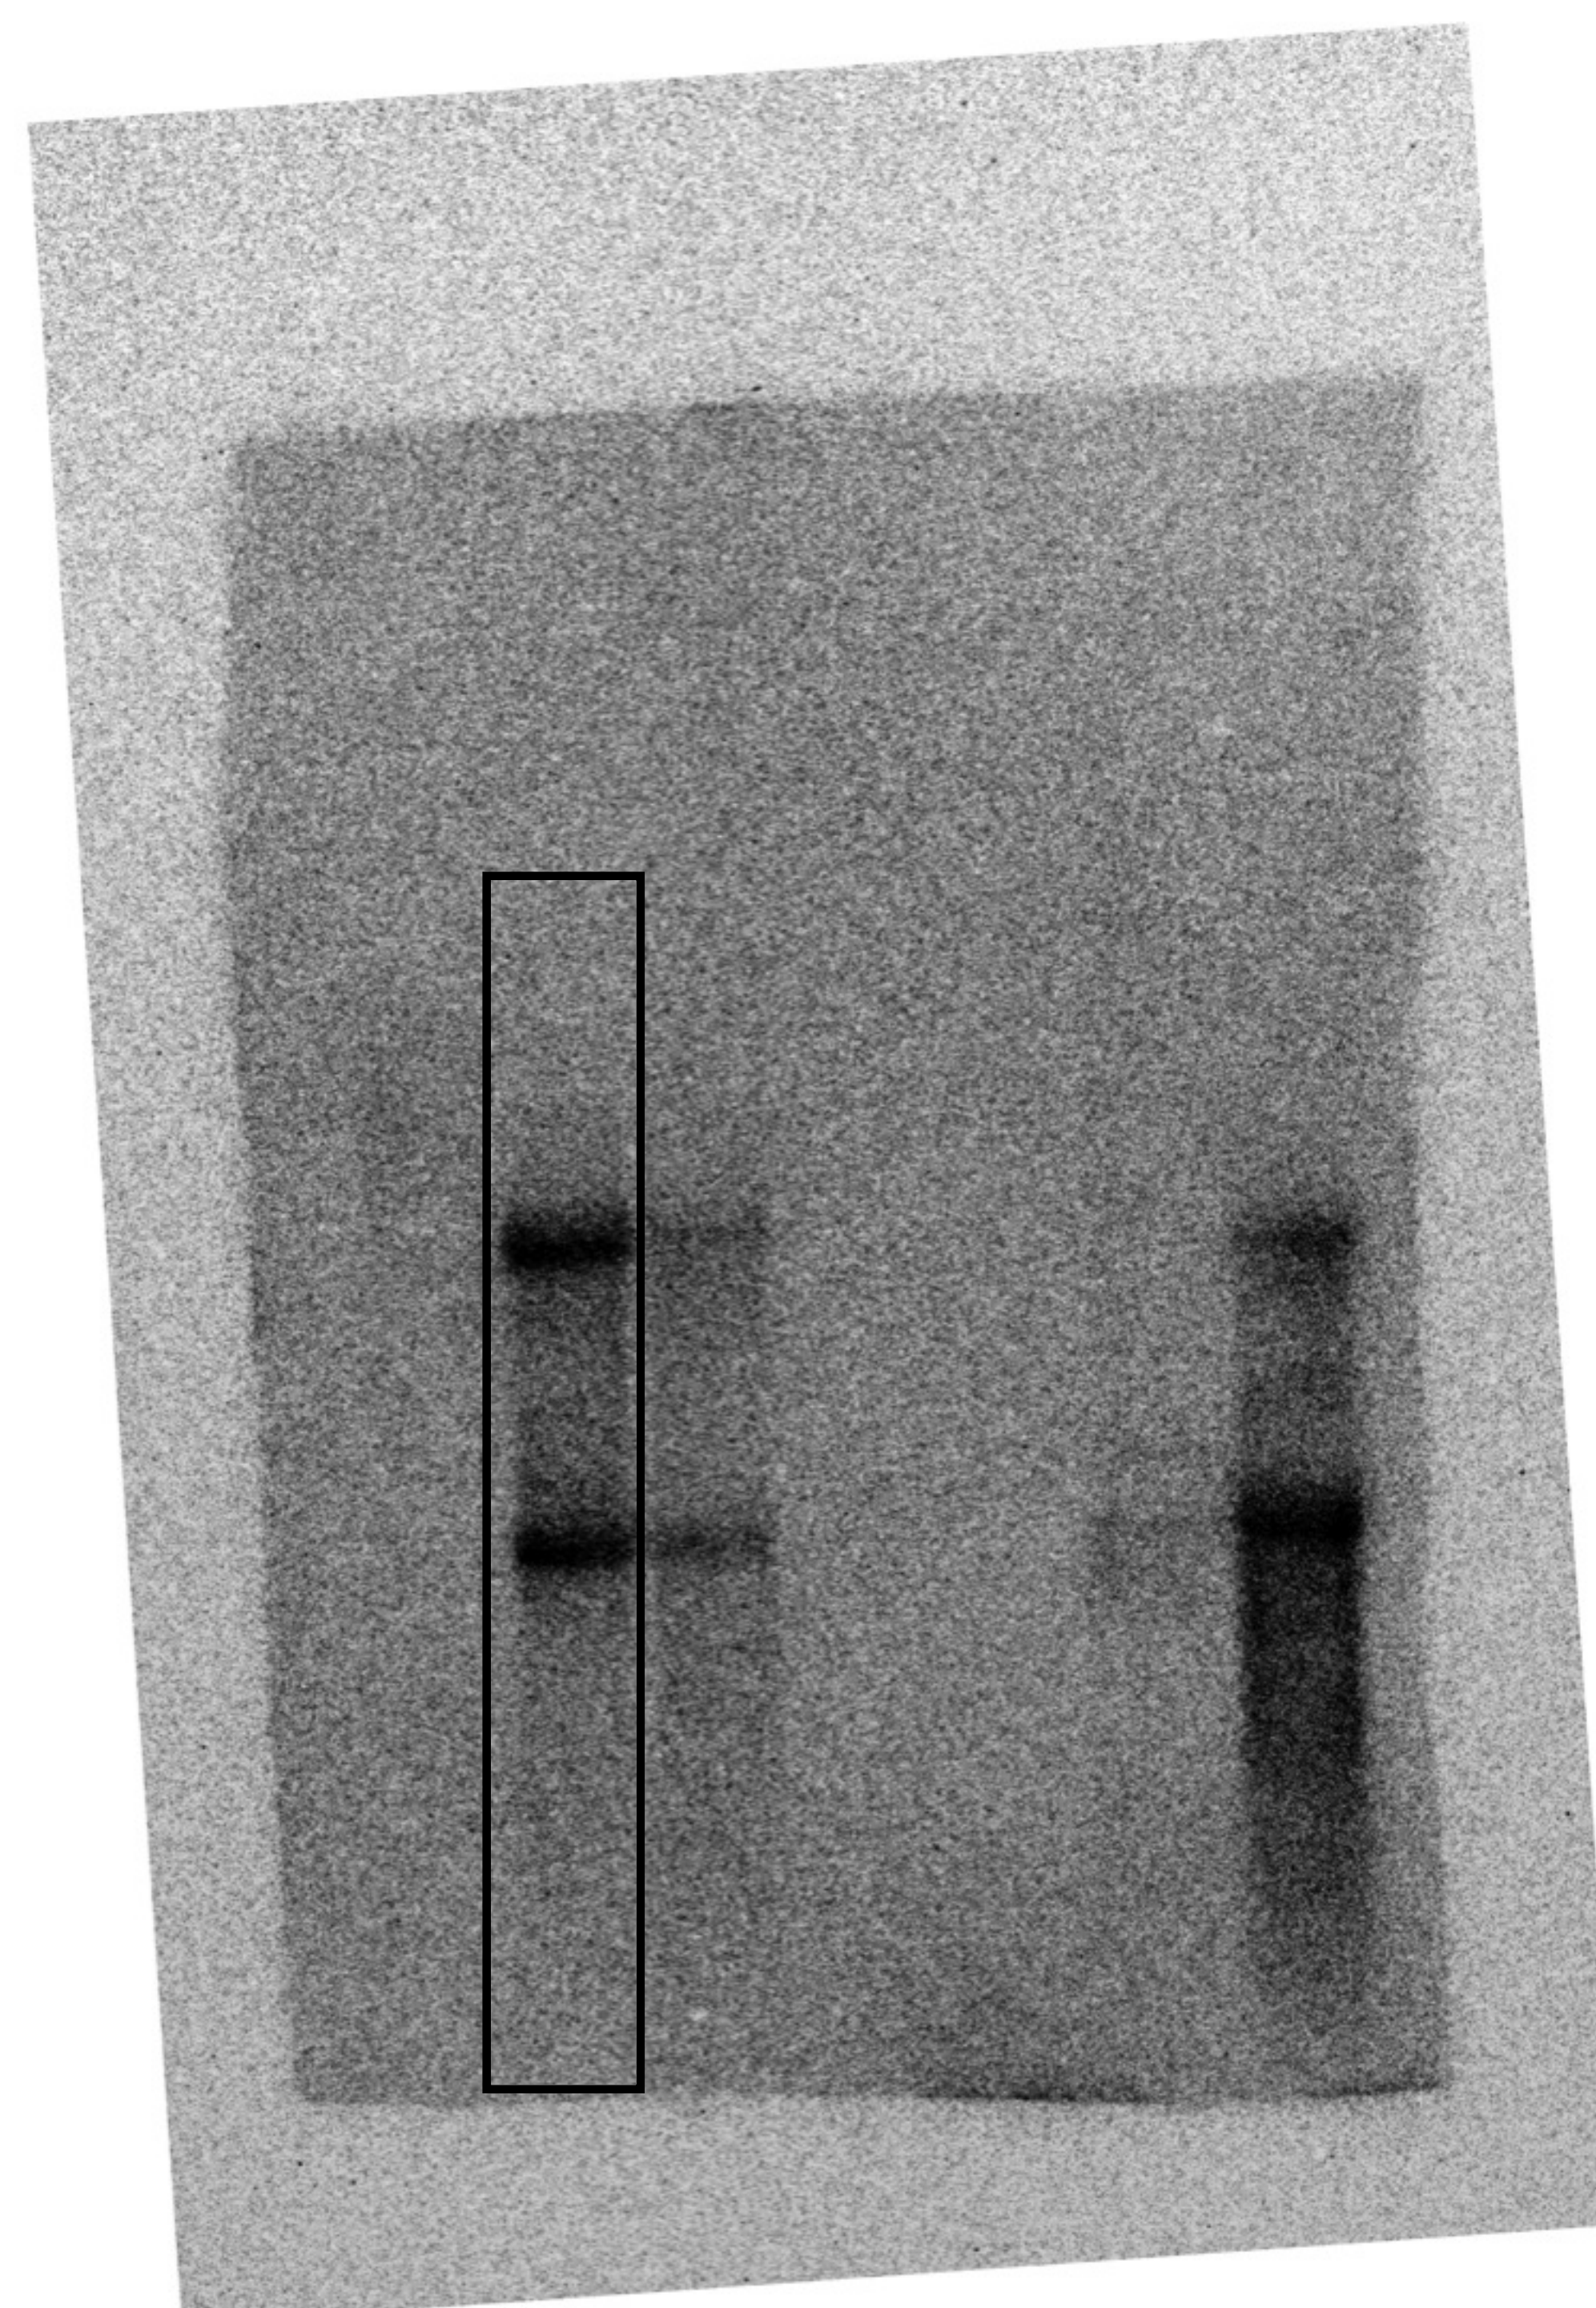

Fig 1e

Pri-miR-122

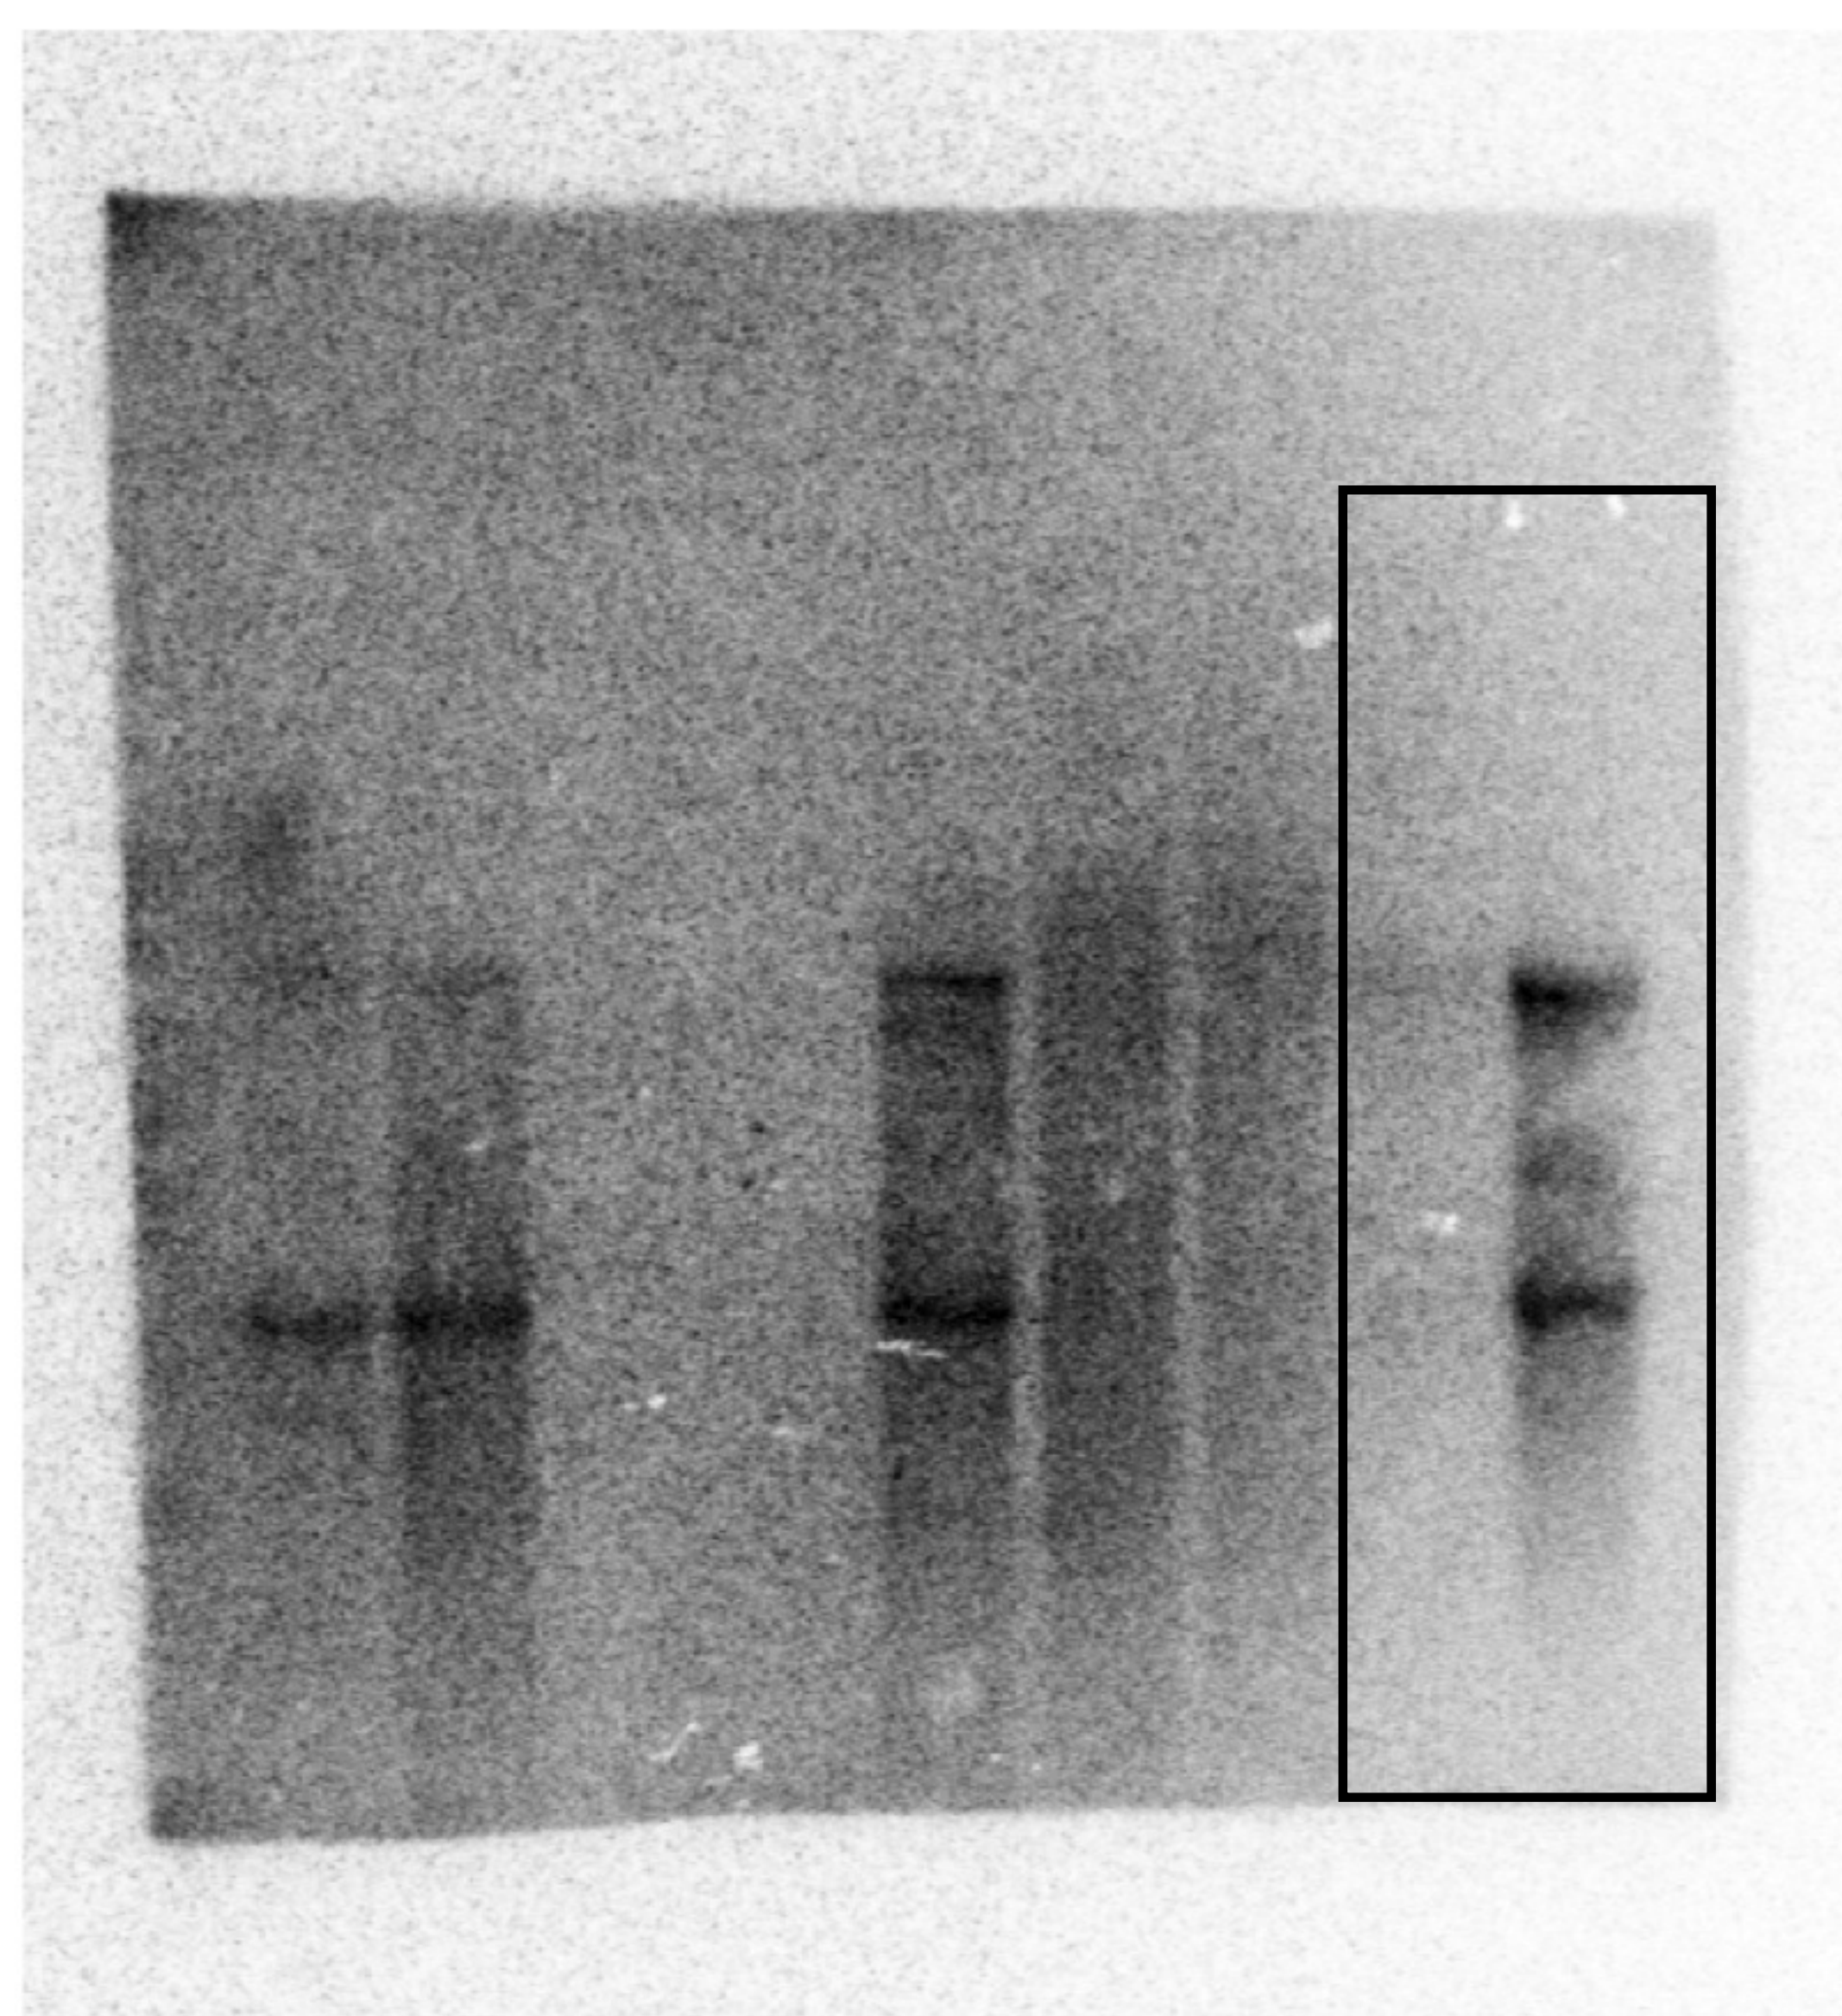

Actin mRNA

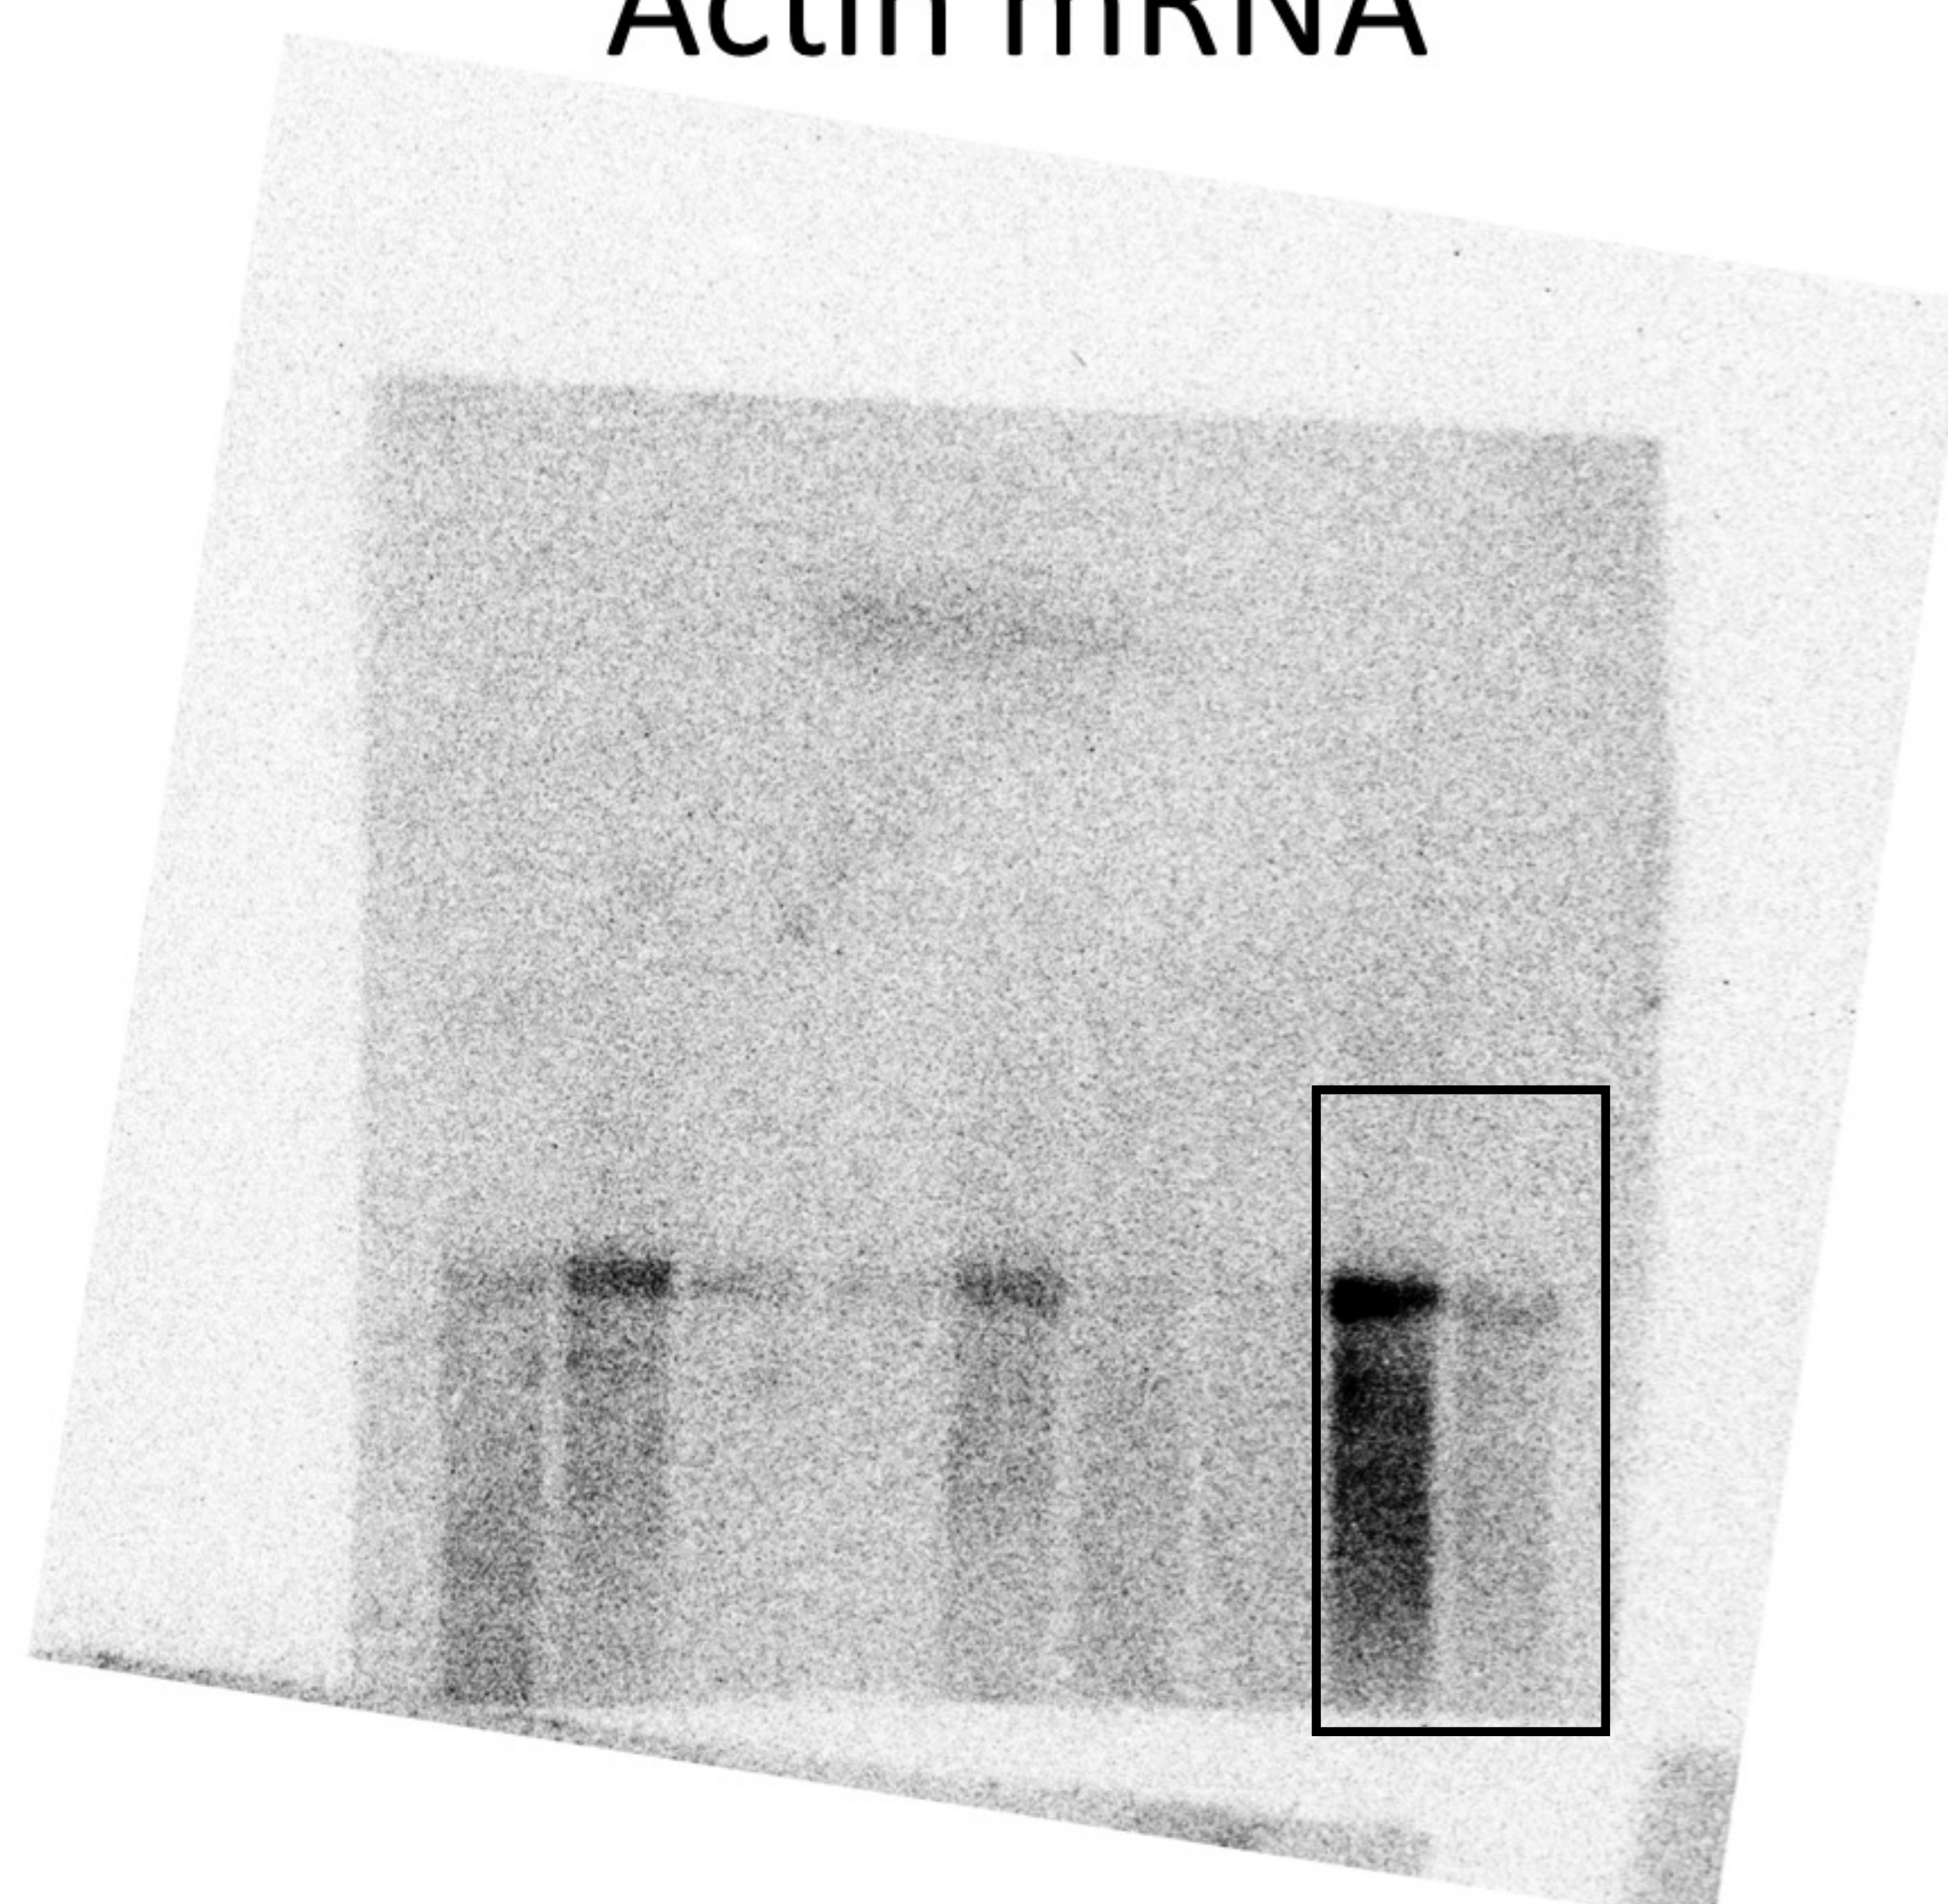



Fig 2c

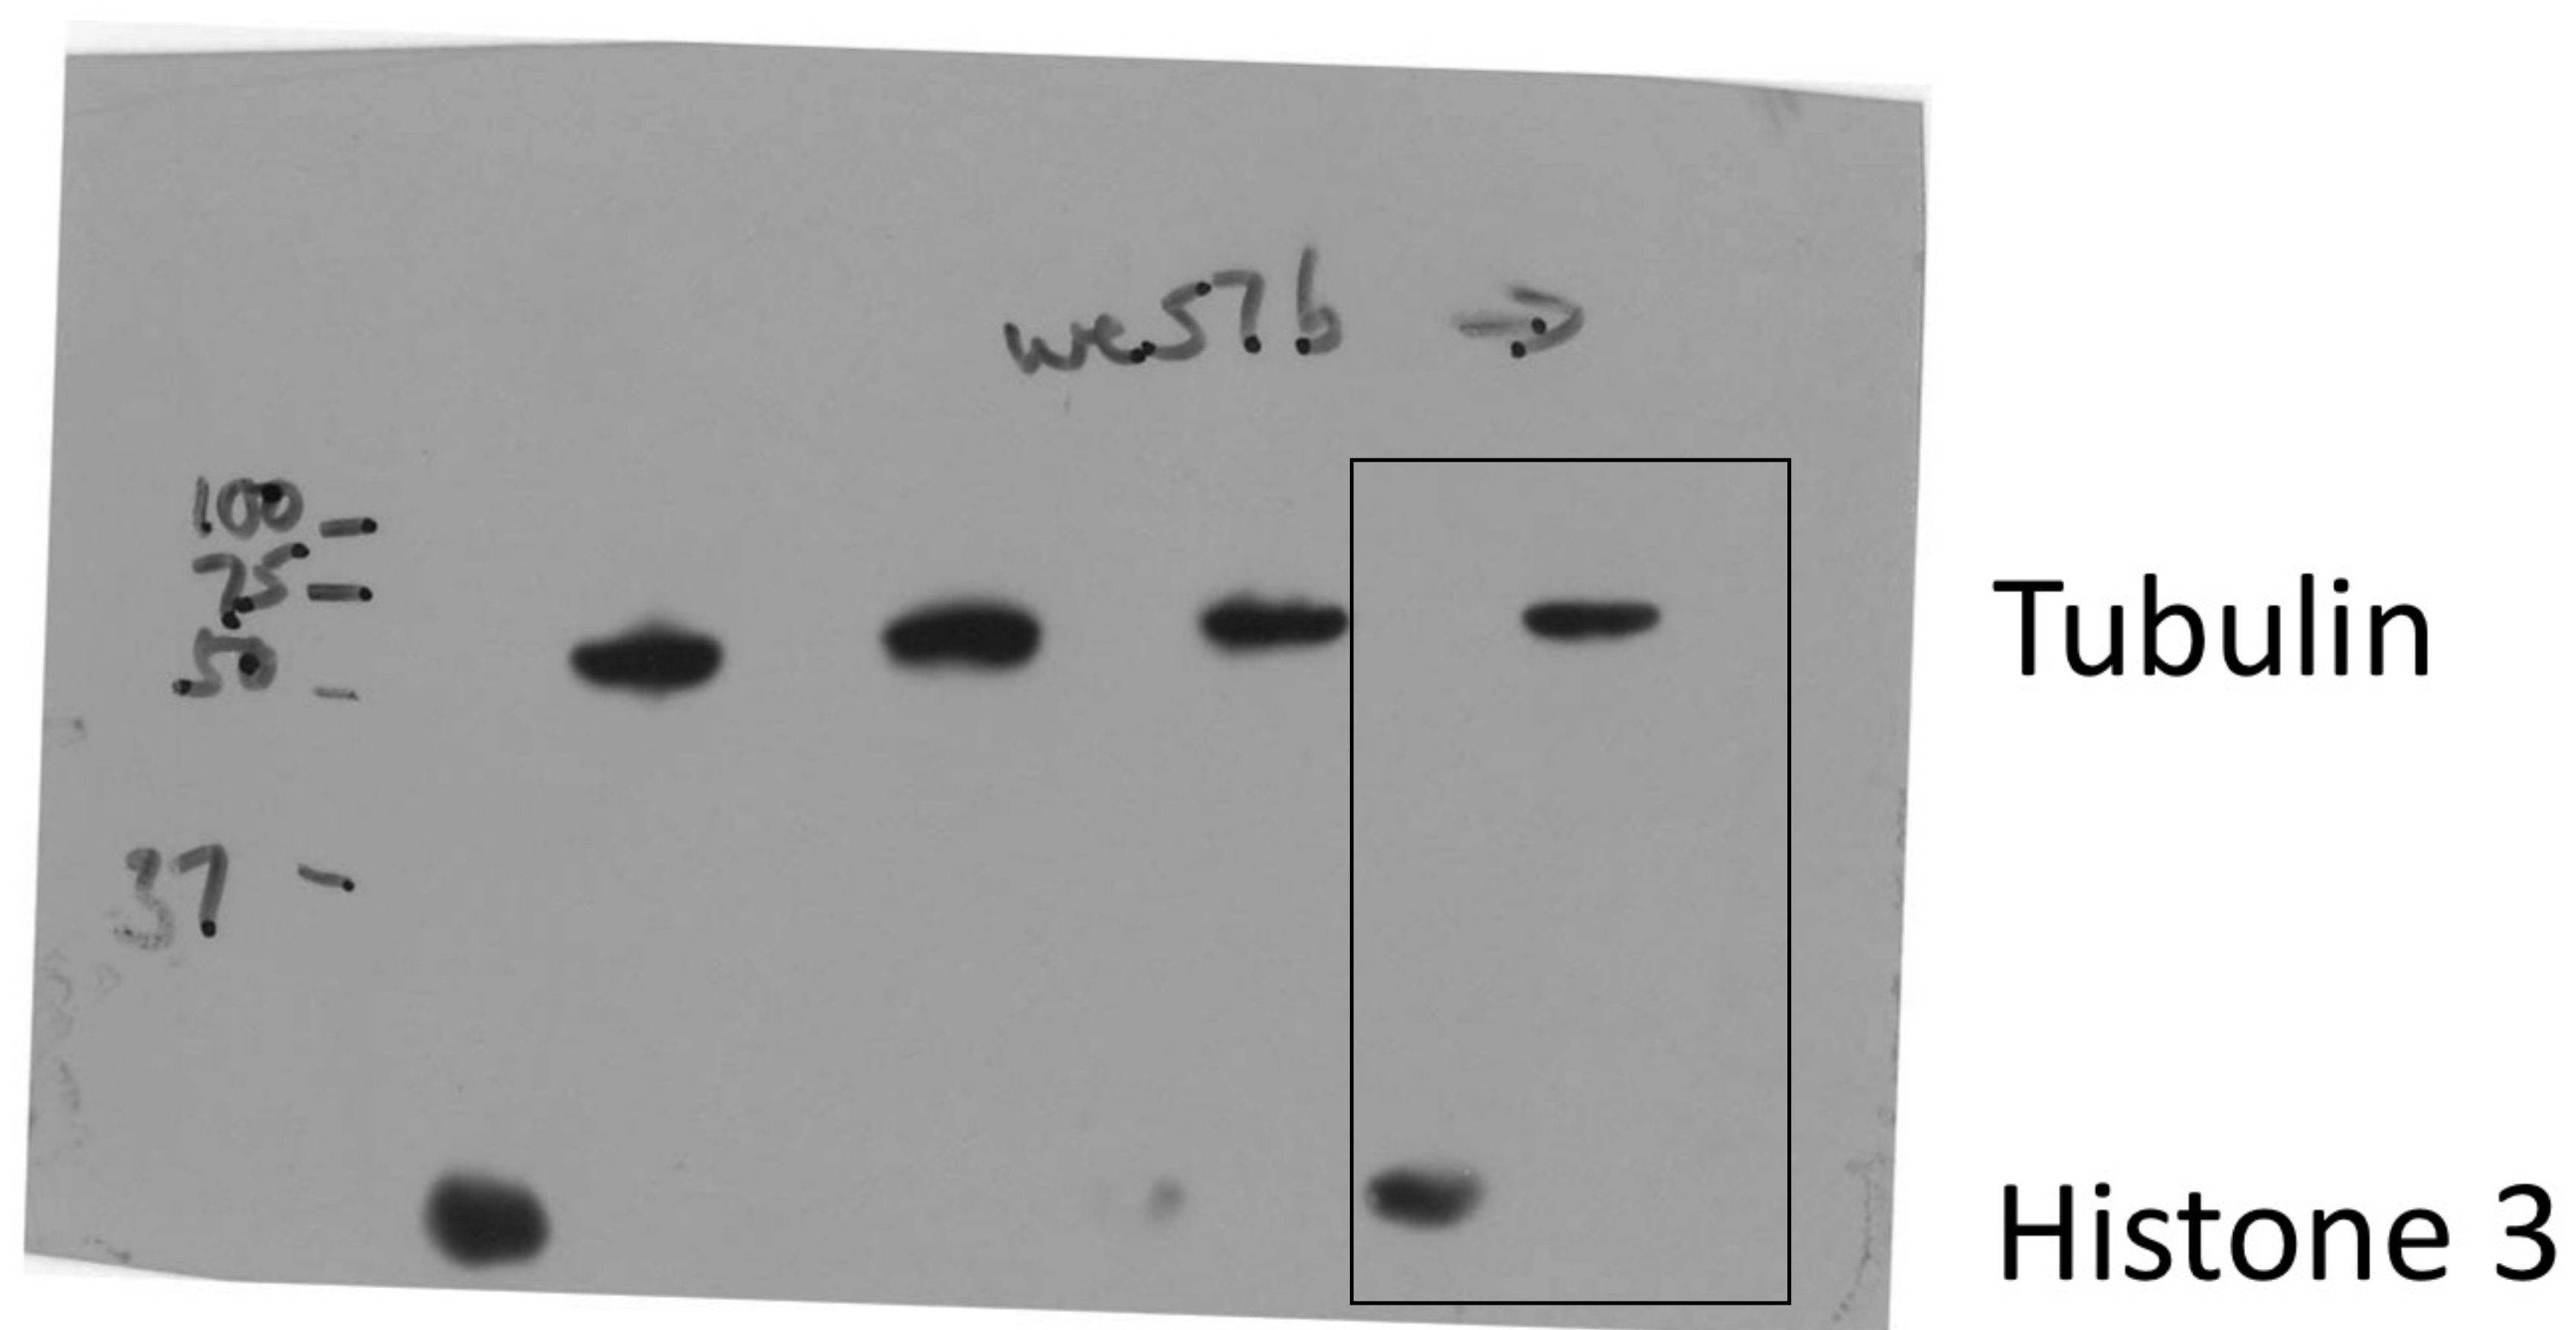

Fig 5d

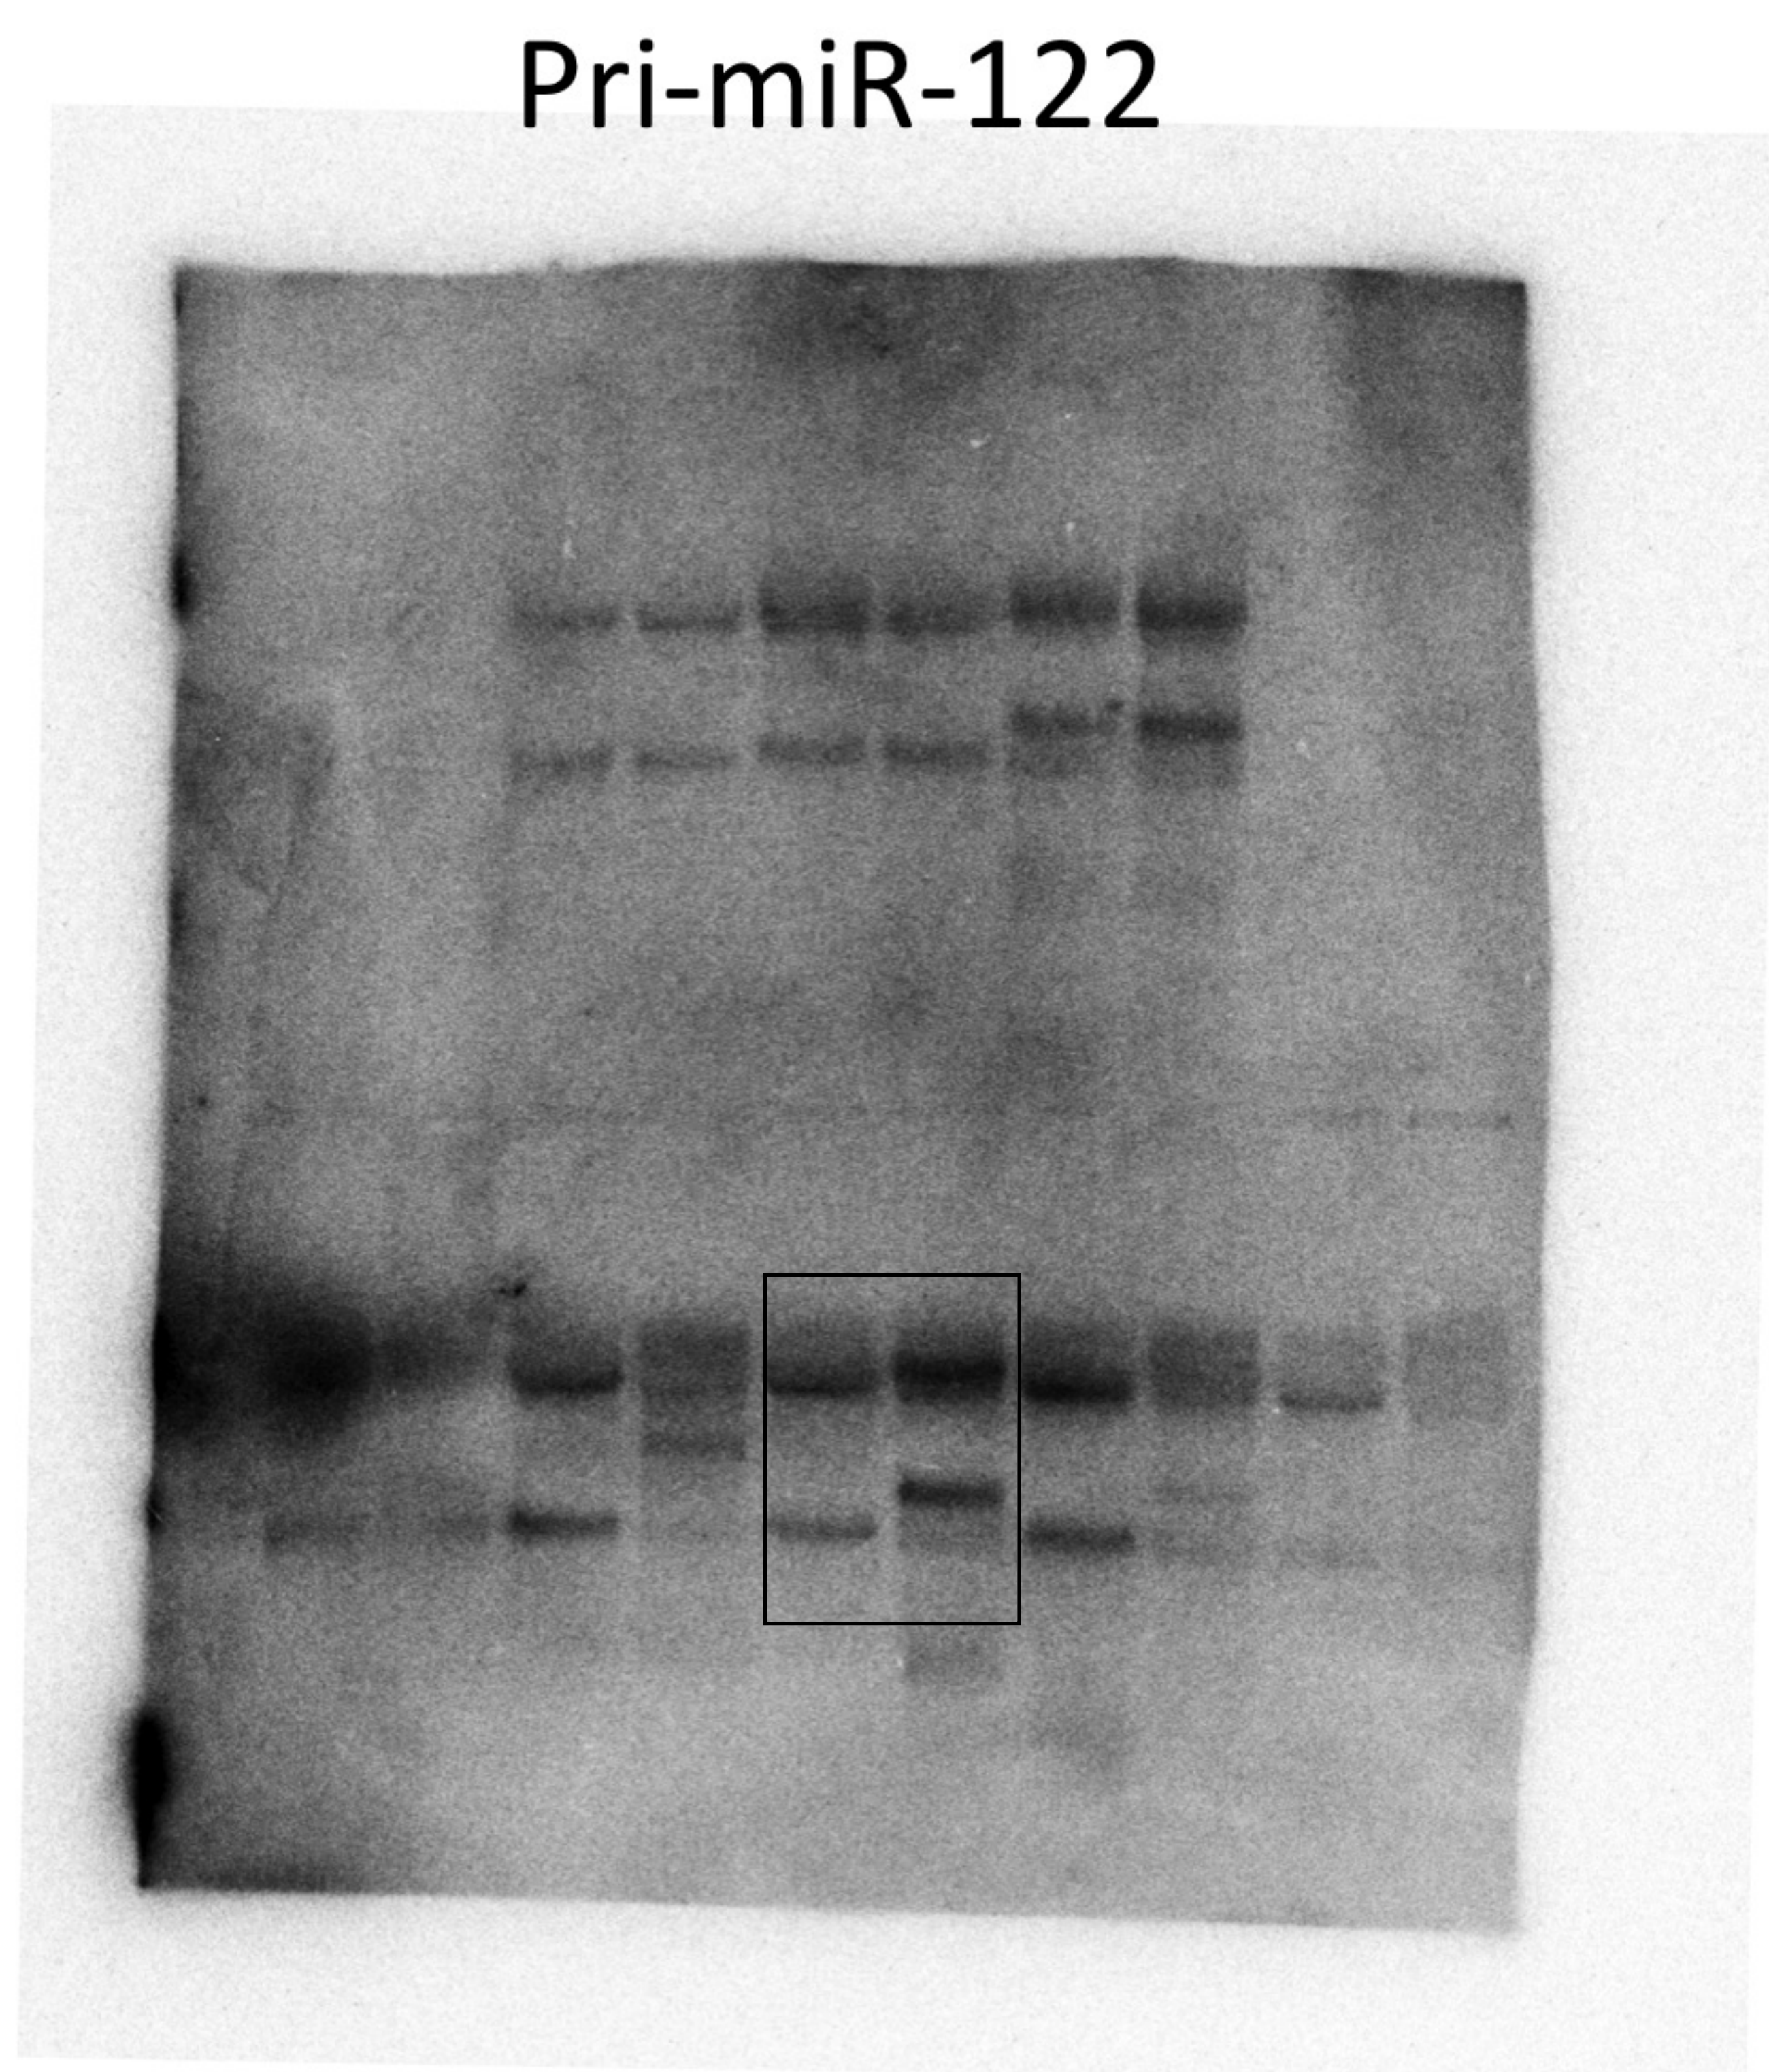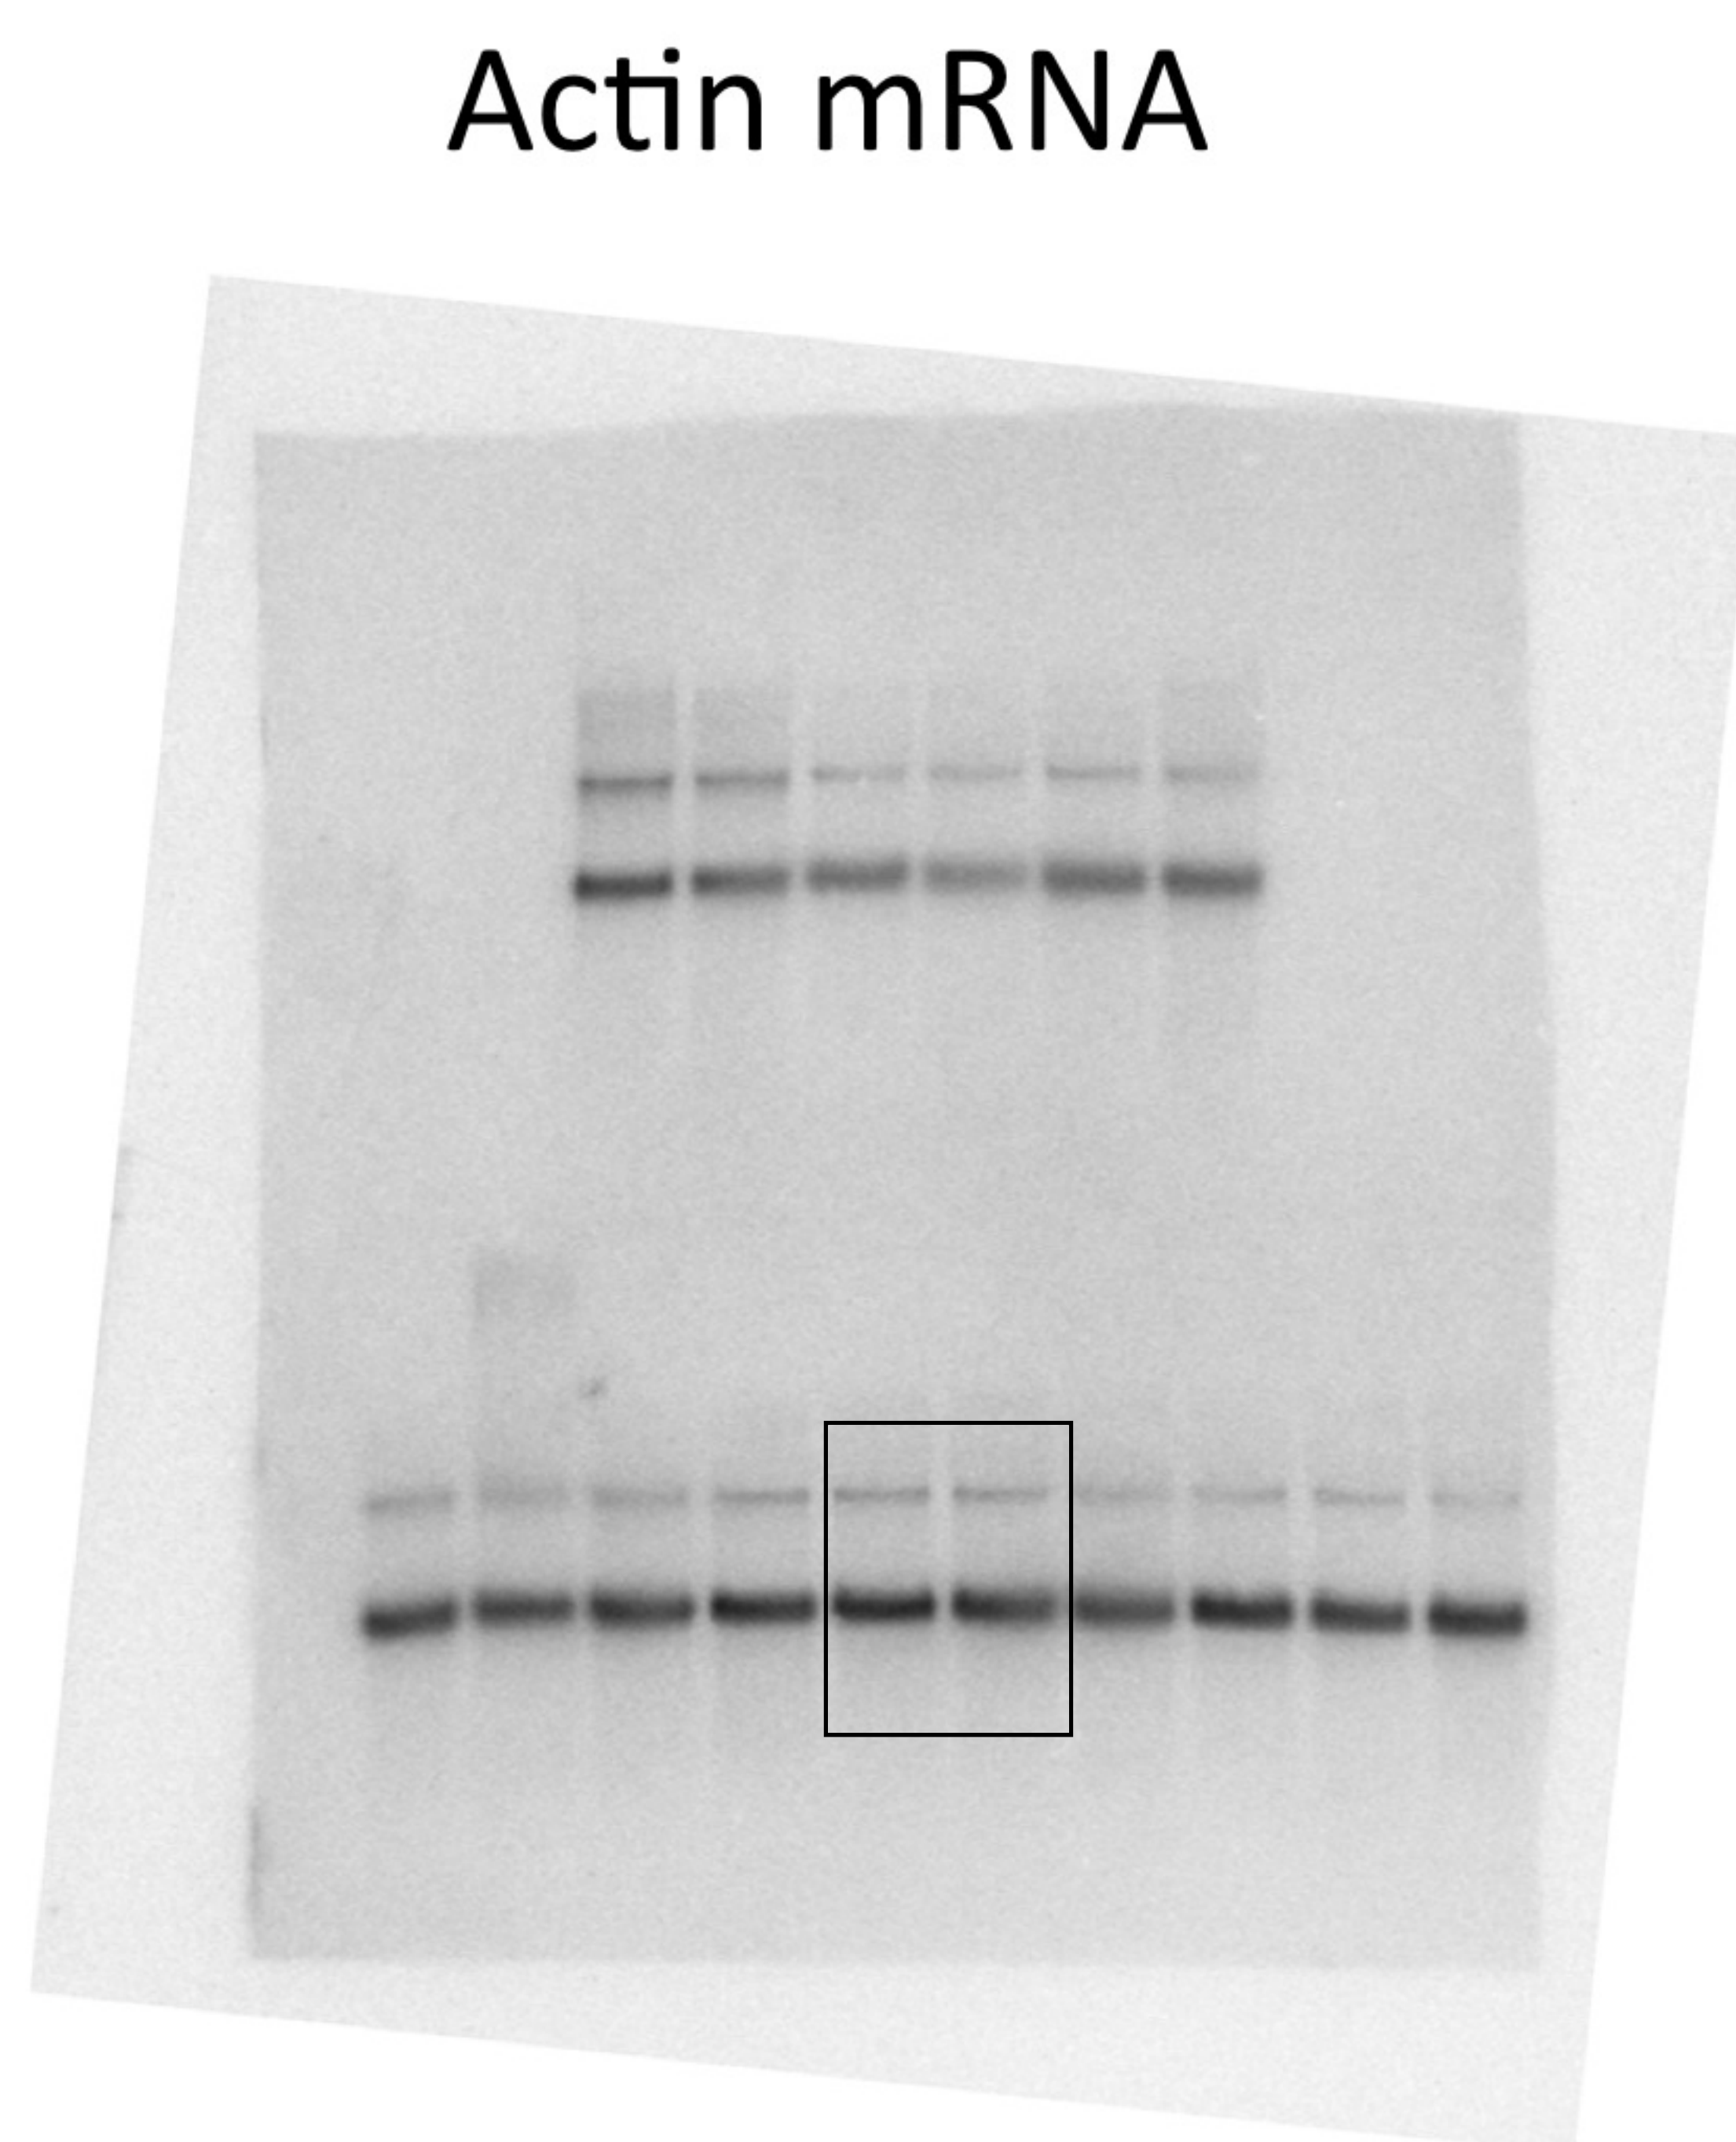



Fig 5e

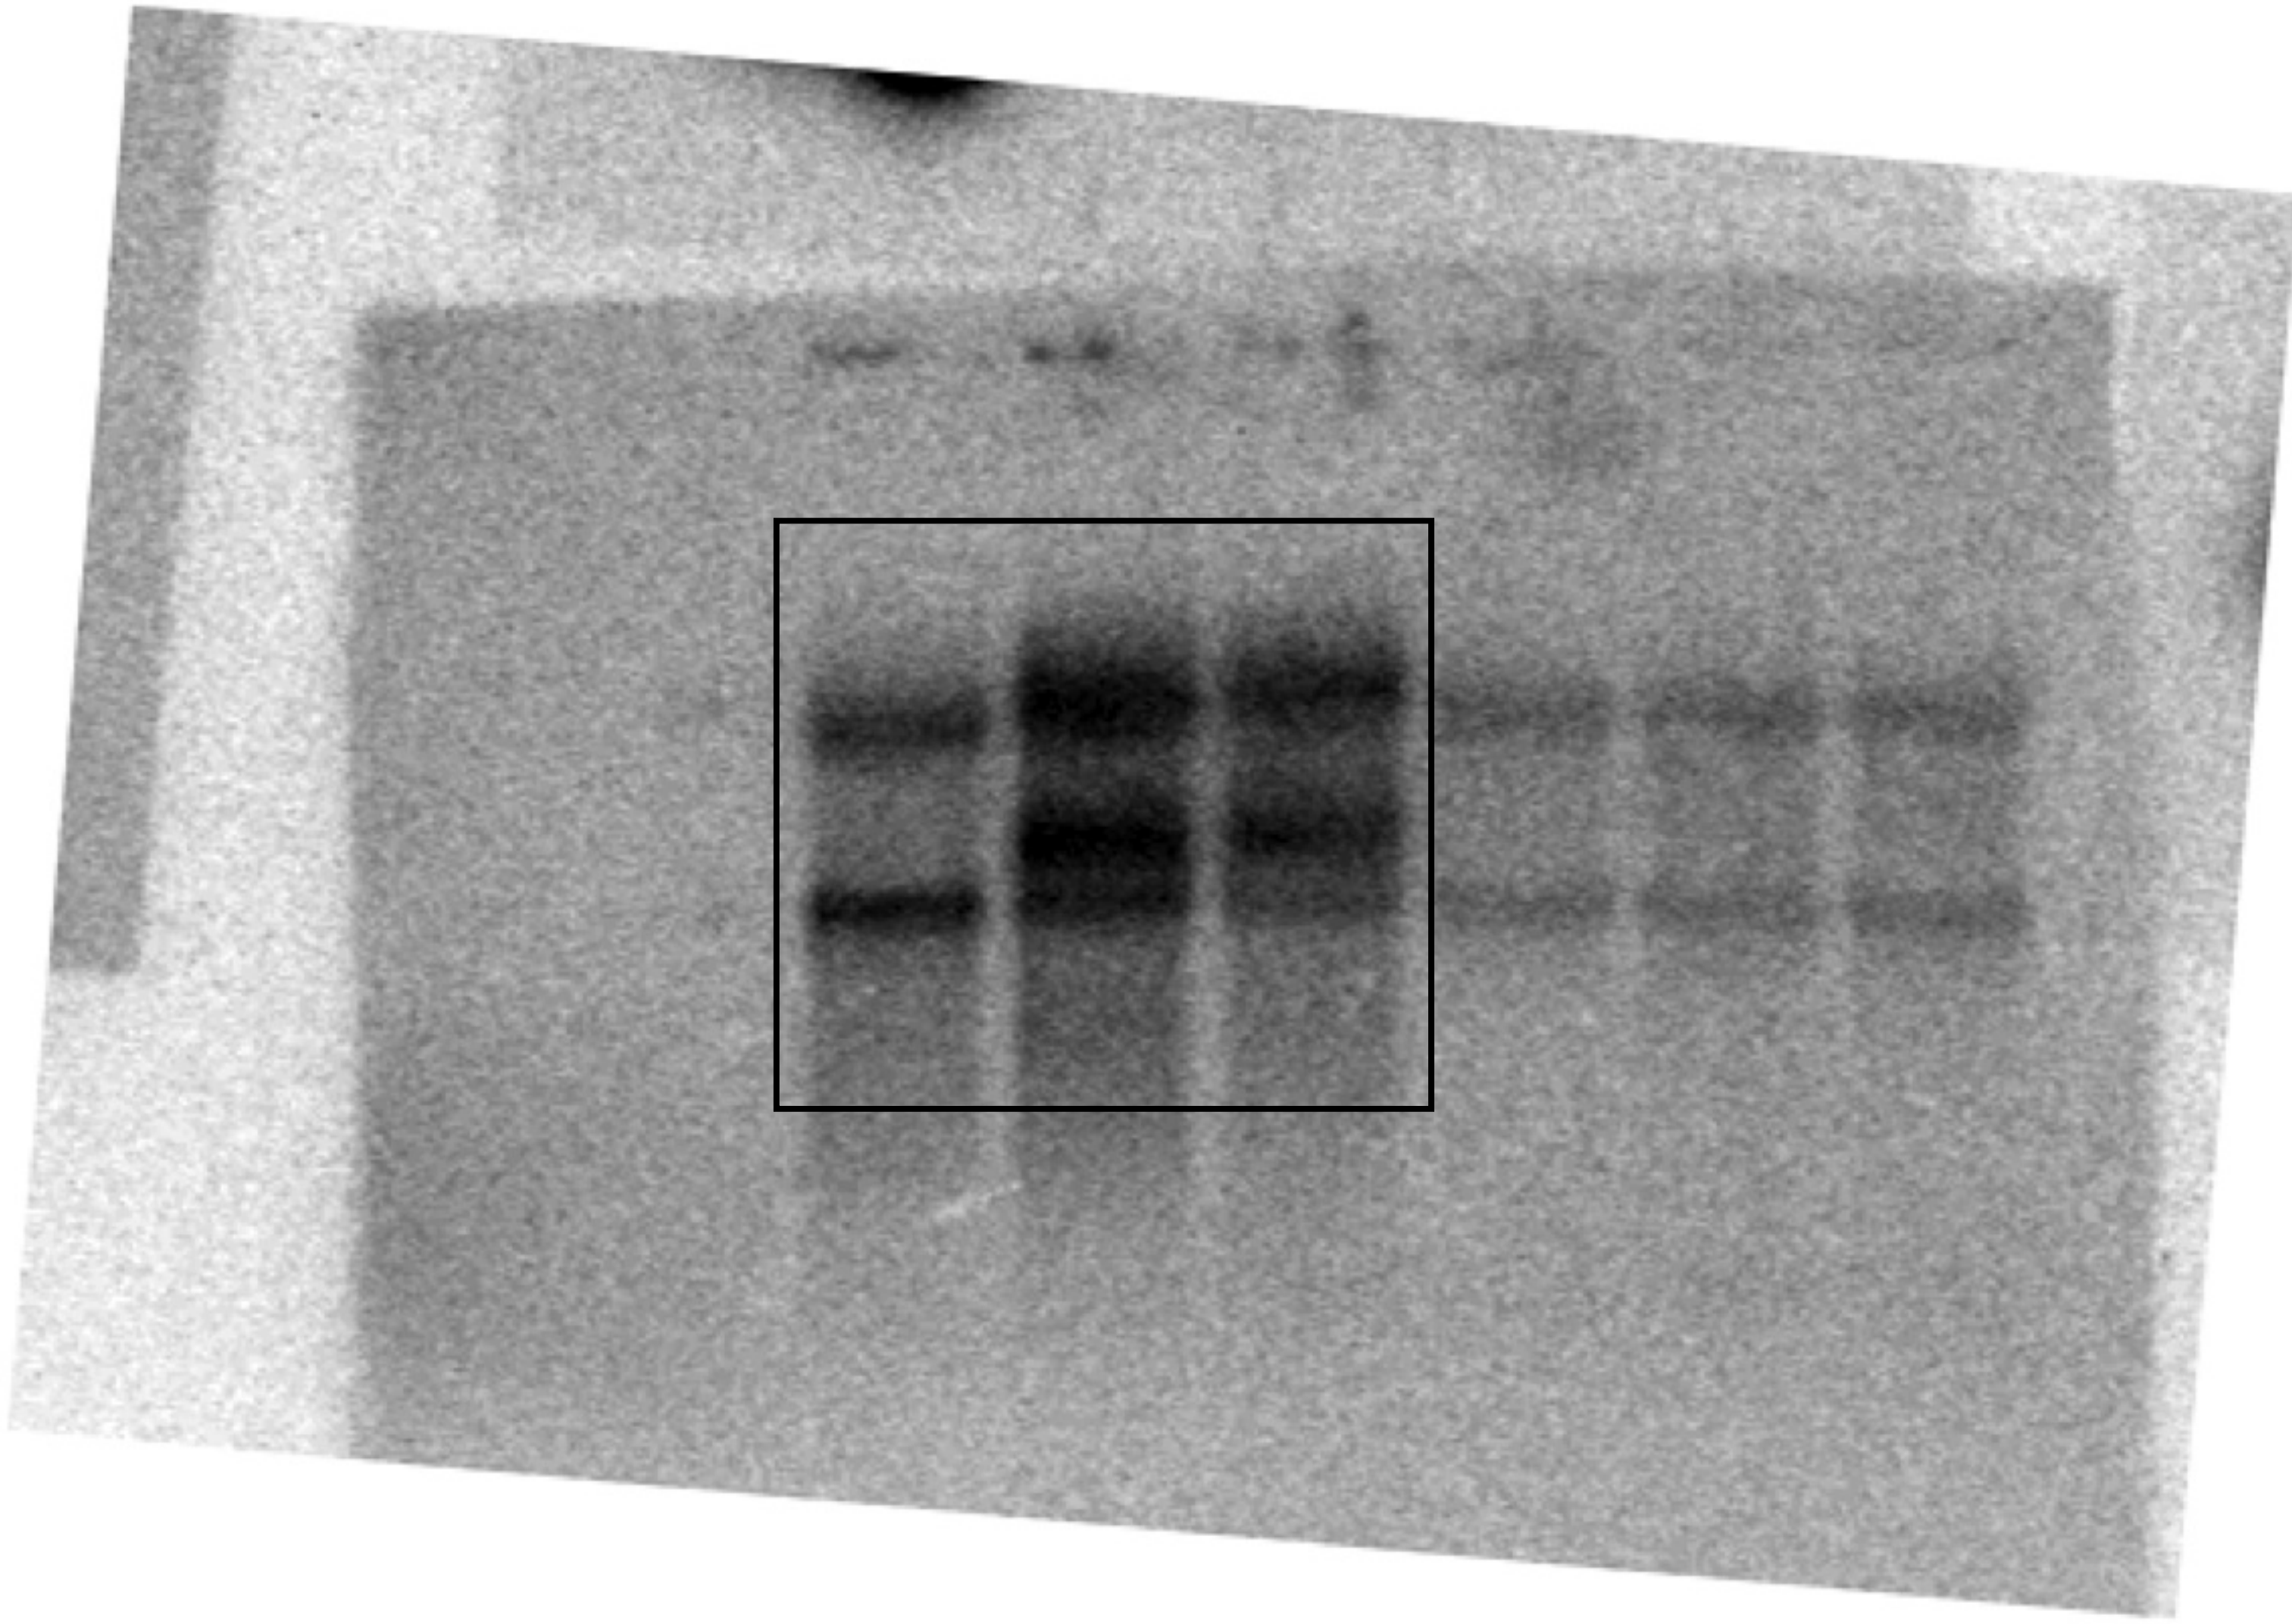

Pri-miR-122

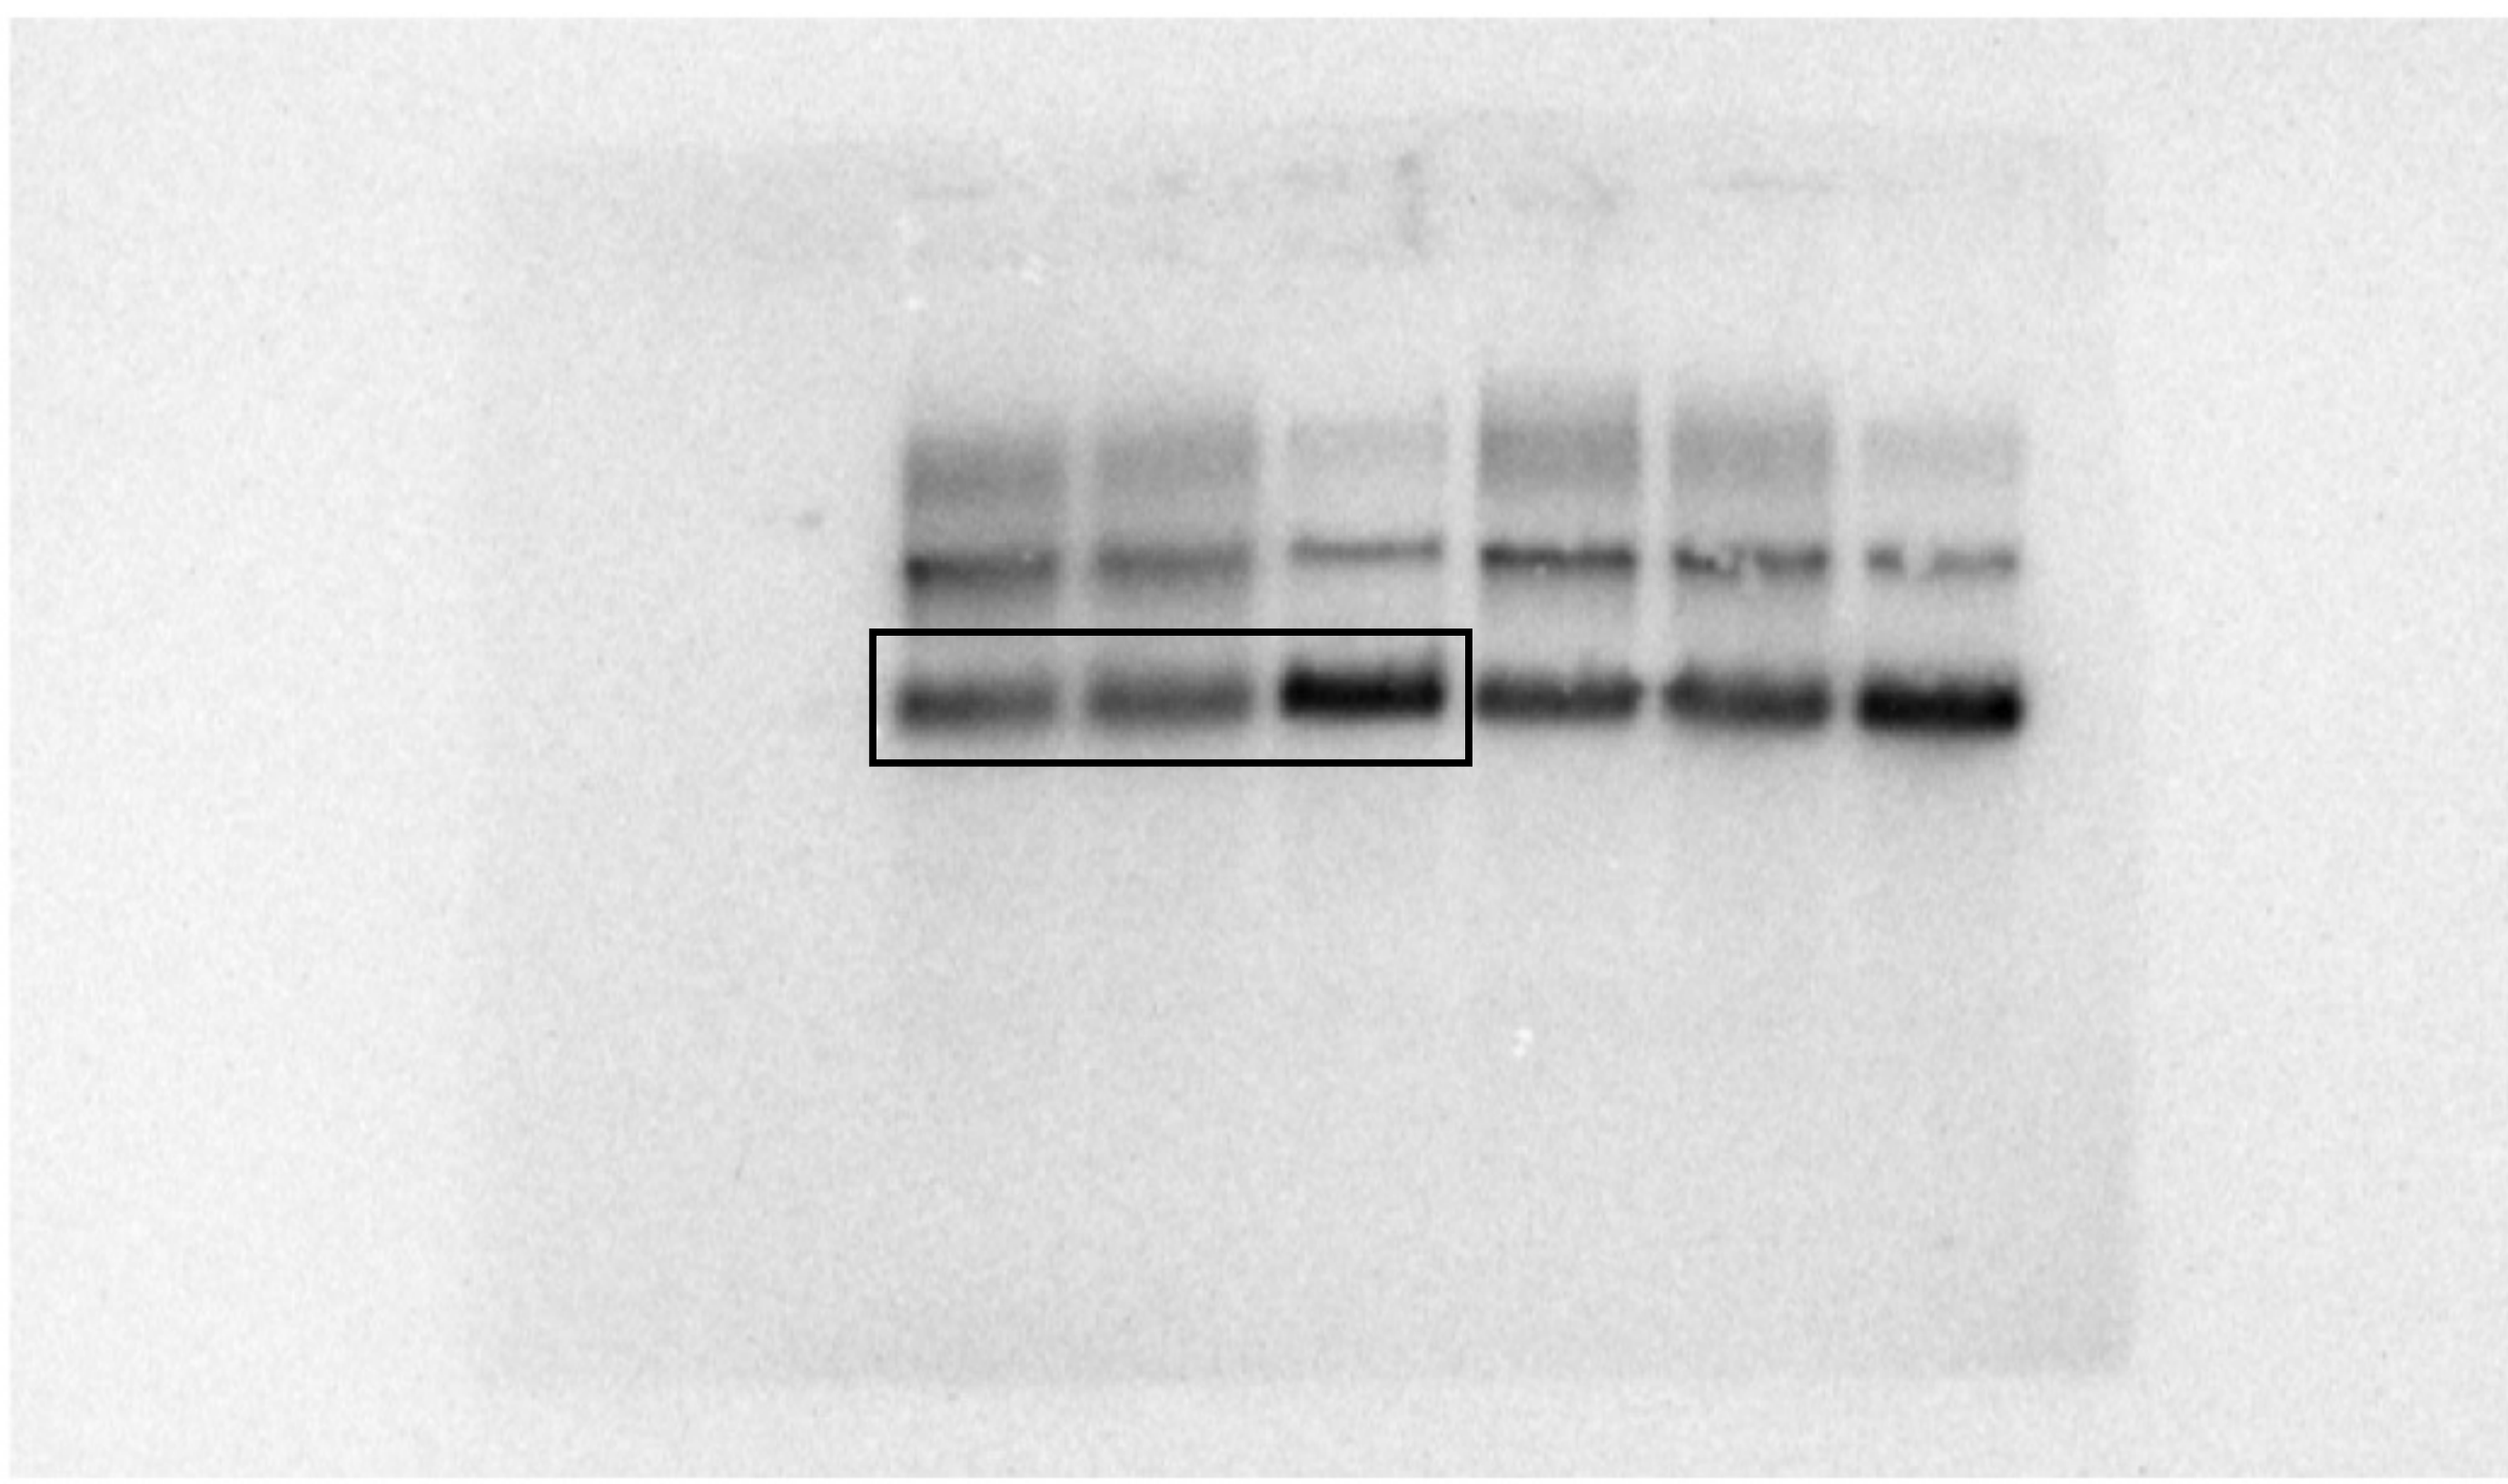

Actin mRNA

Fig 5g Pri-miR-122

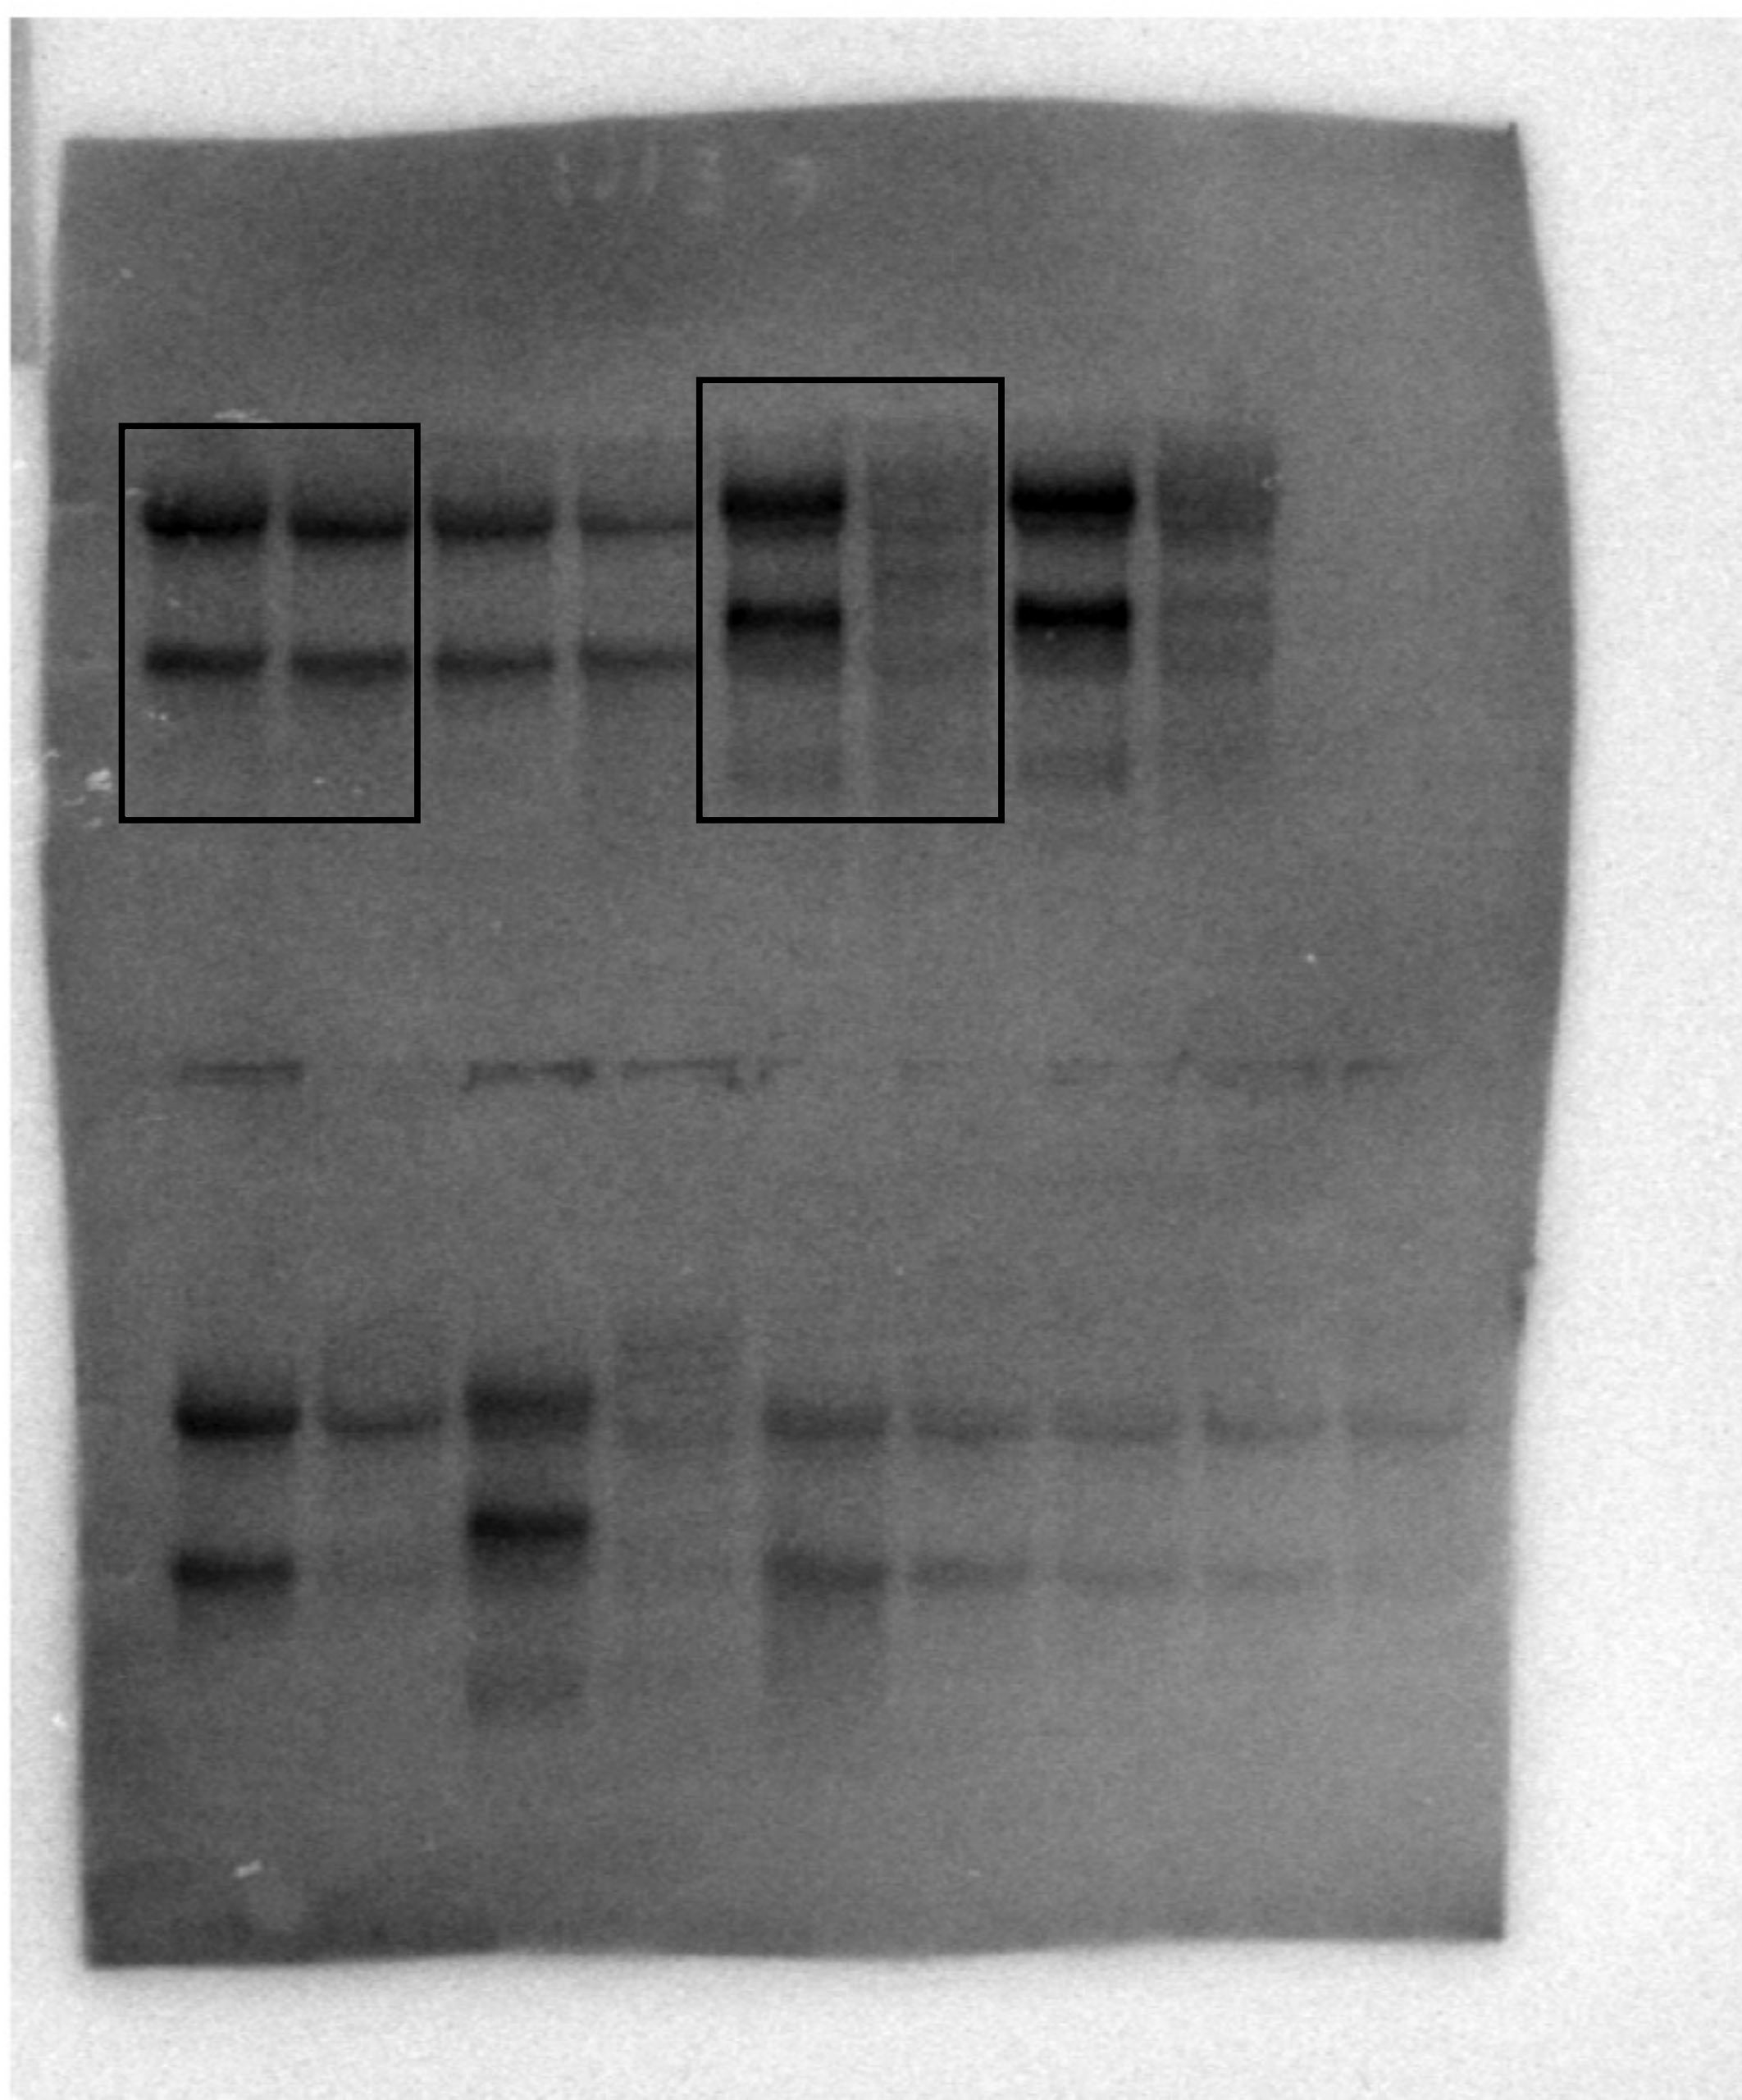

Actin mRNA

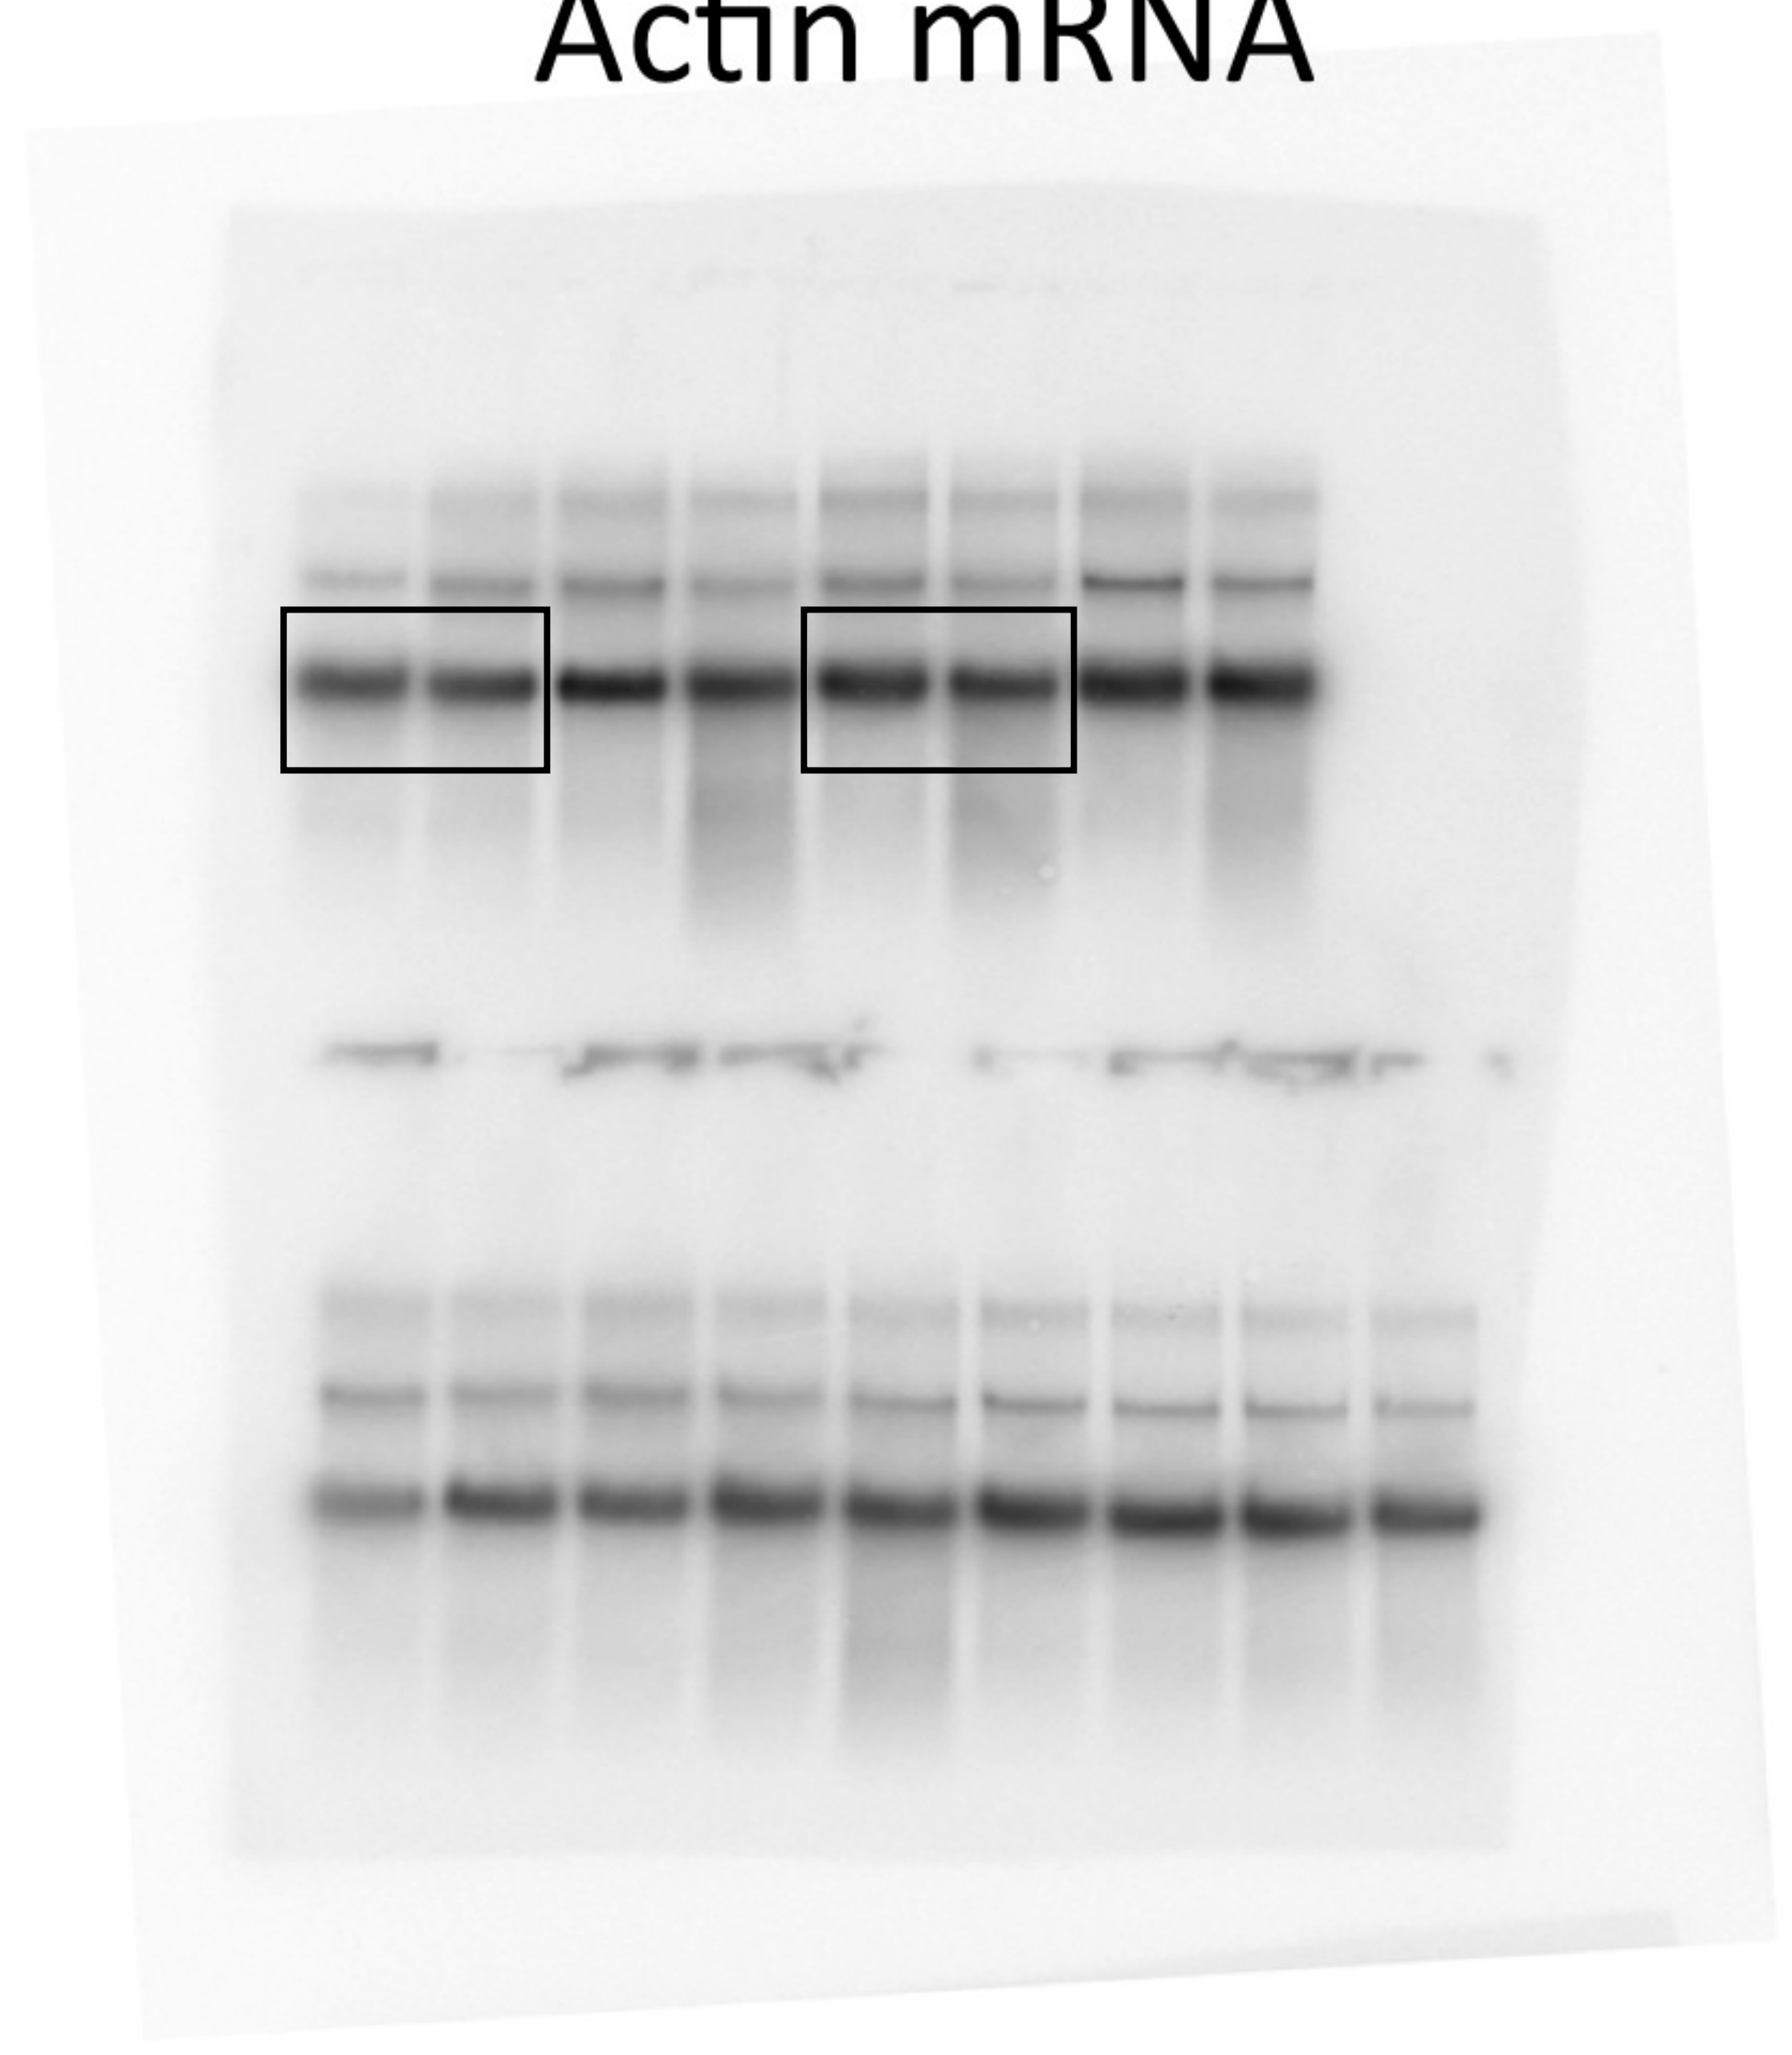



Fig 1b, 5c

Pri-miR-122

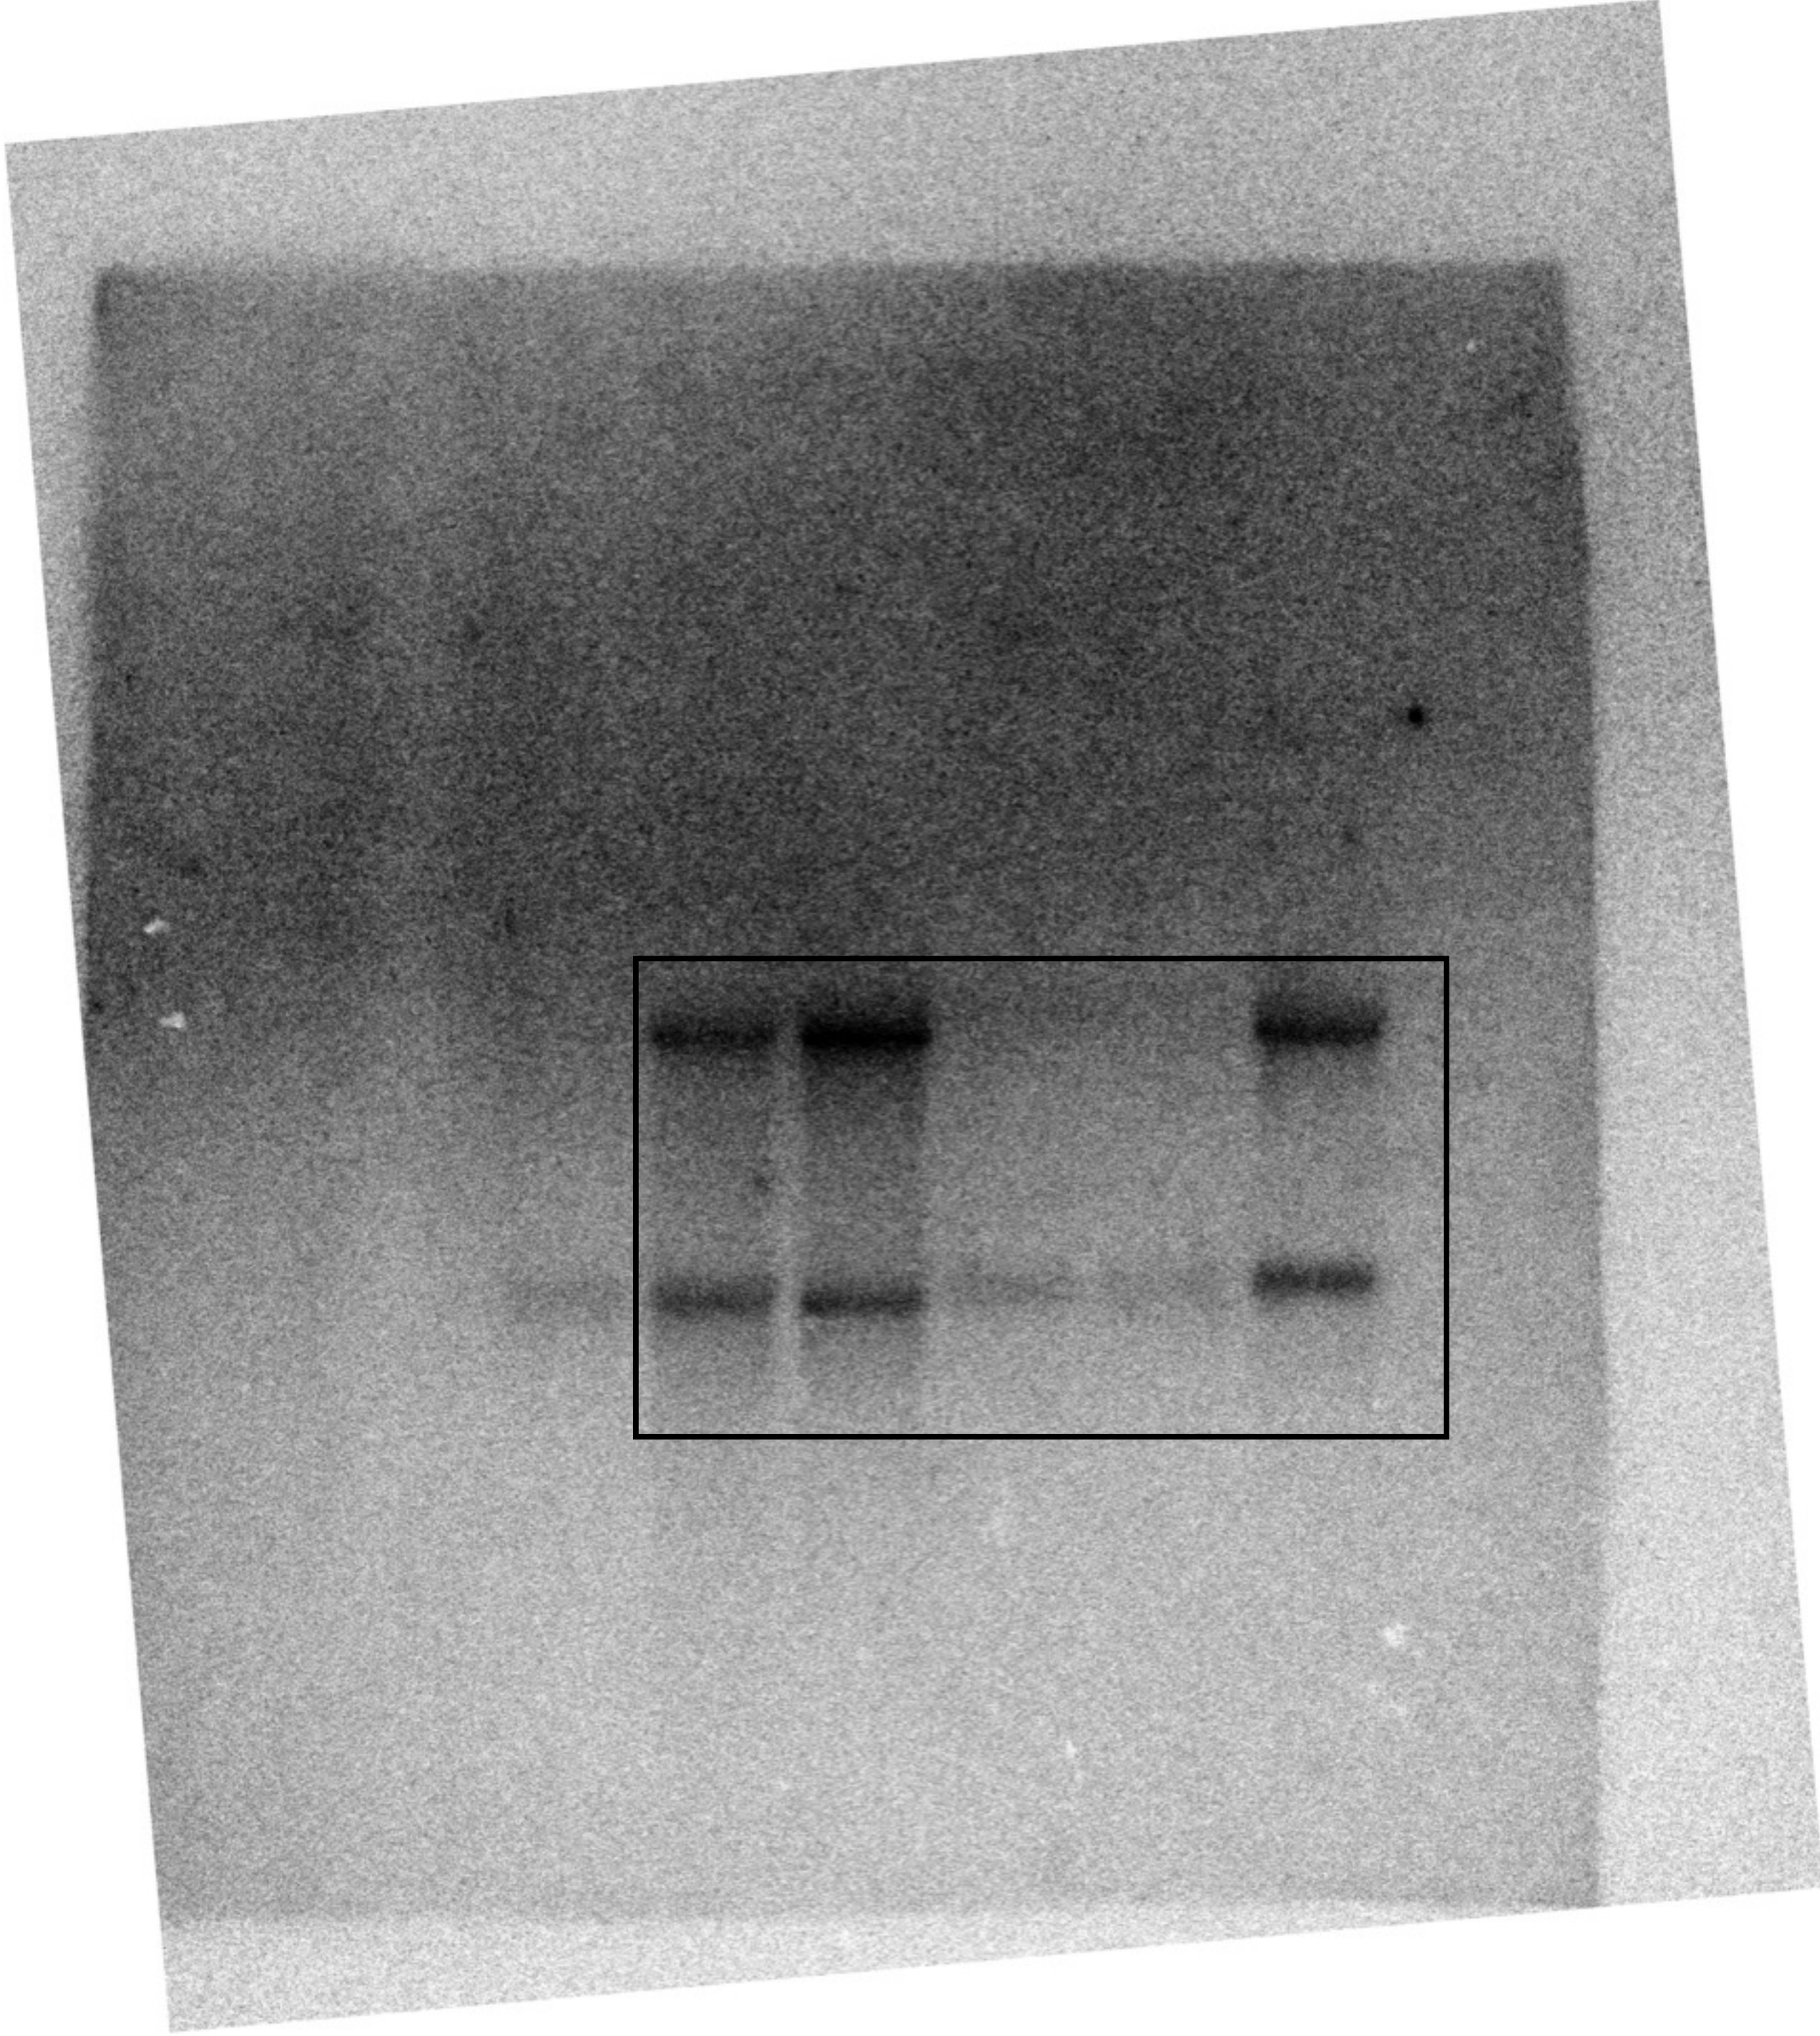

Actin mRNA

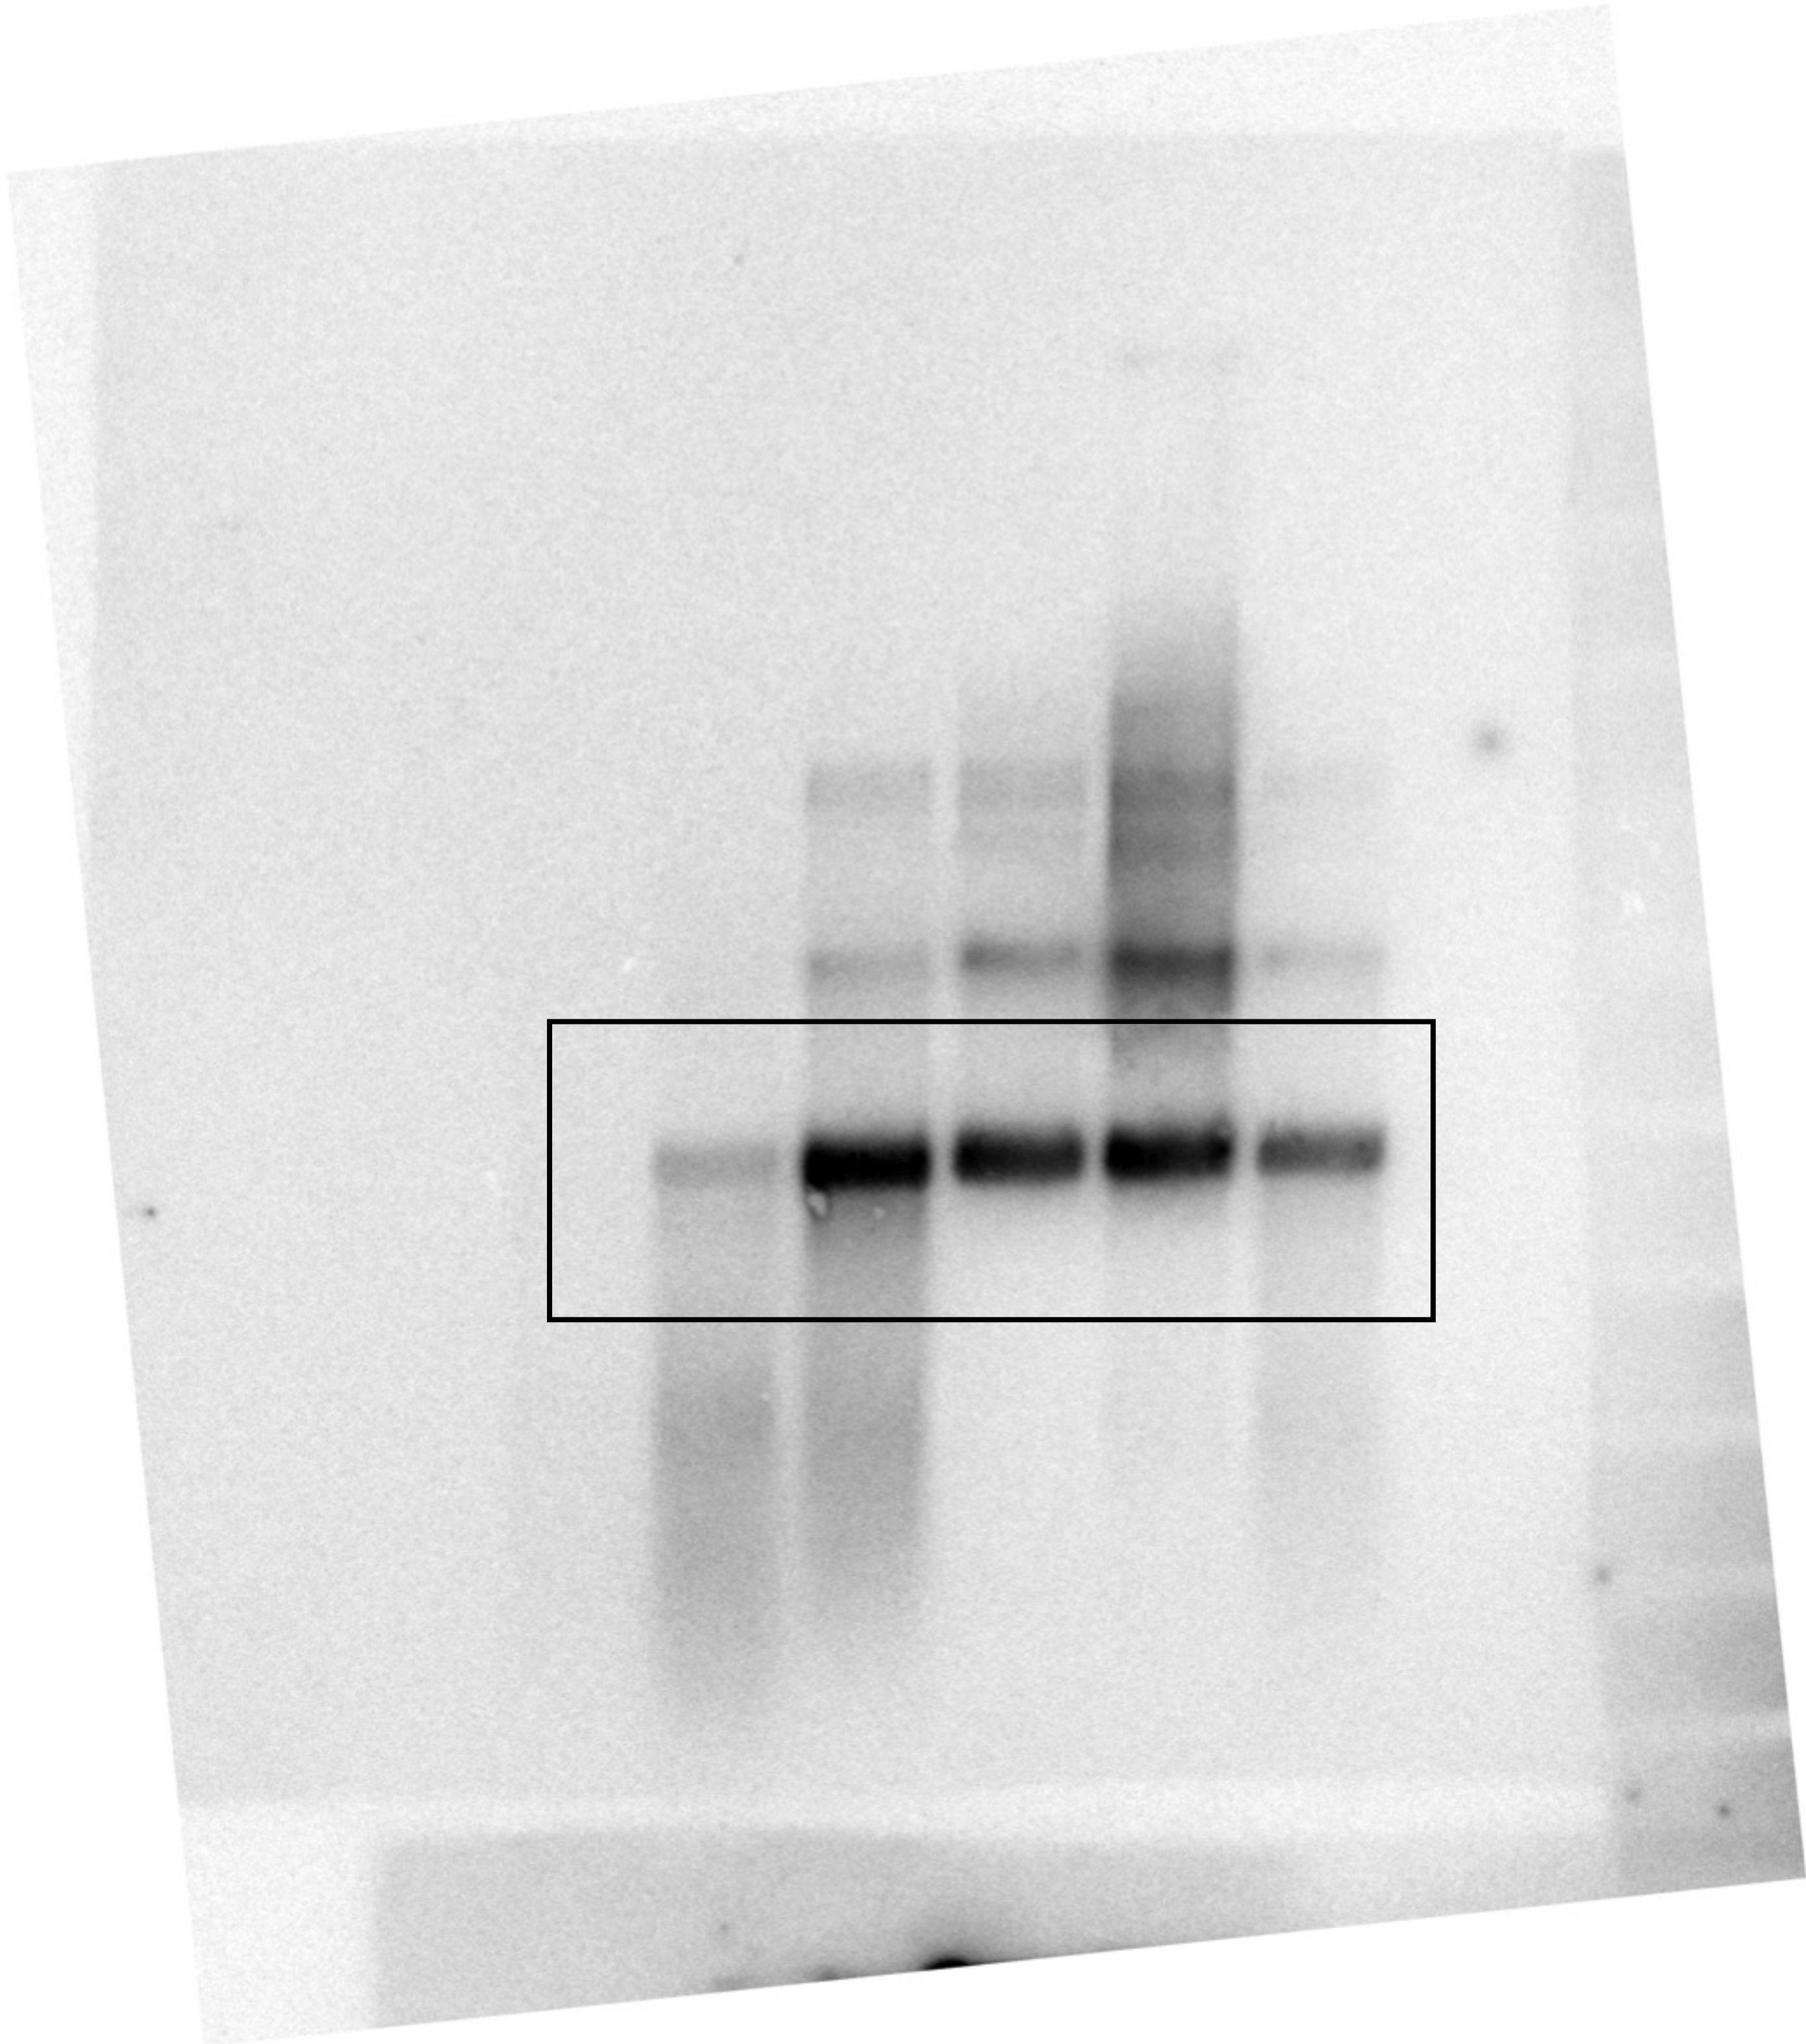



Fig 2b.

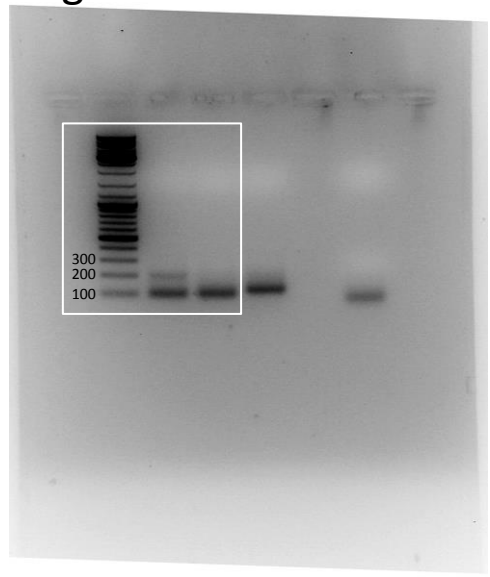

Fig 2c.

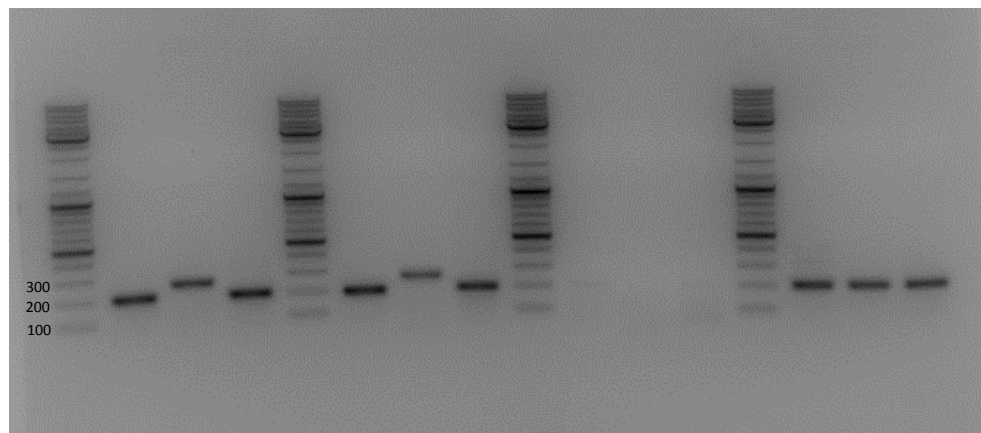



Fig 3c.

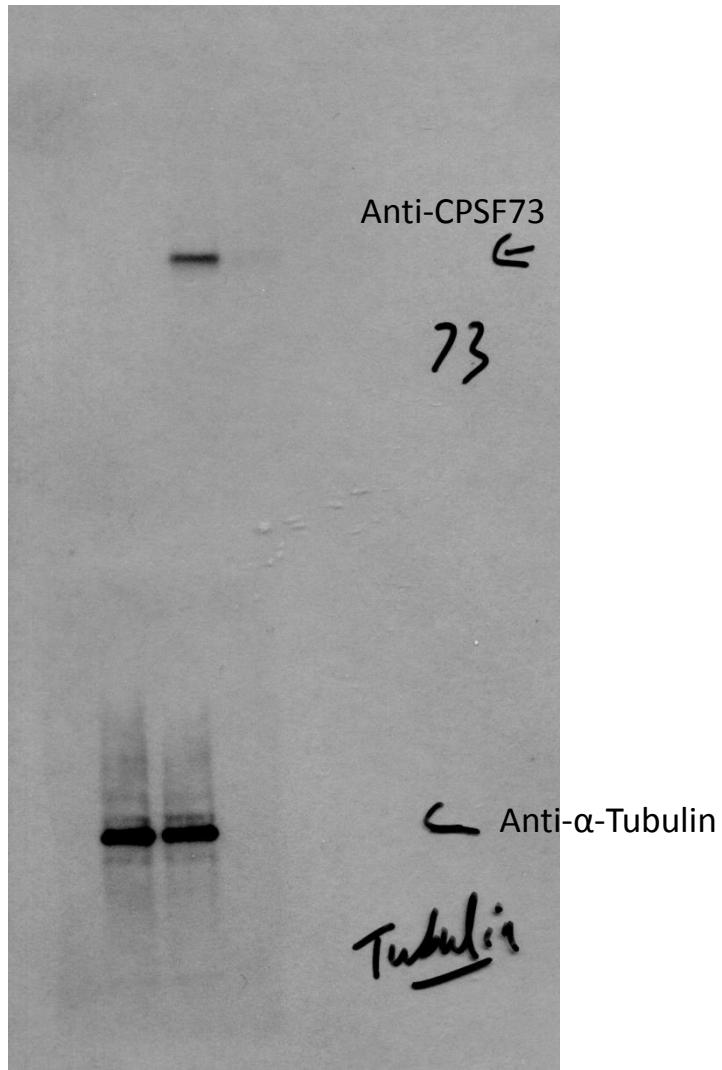

Fig 3c.

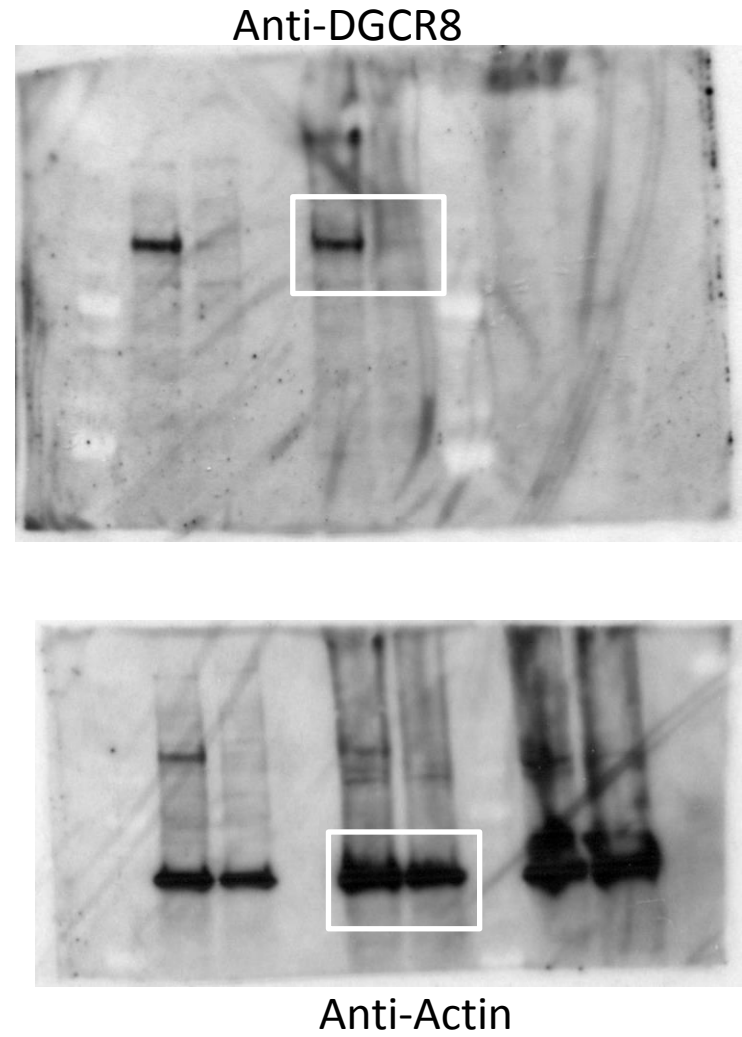



Fig 1b

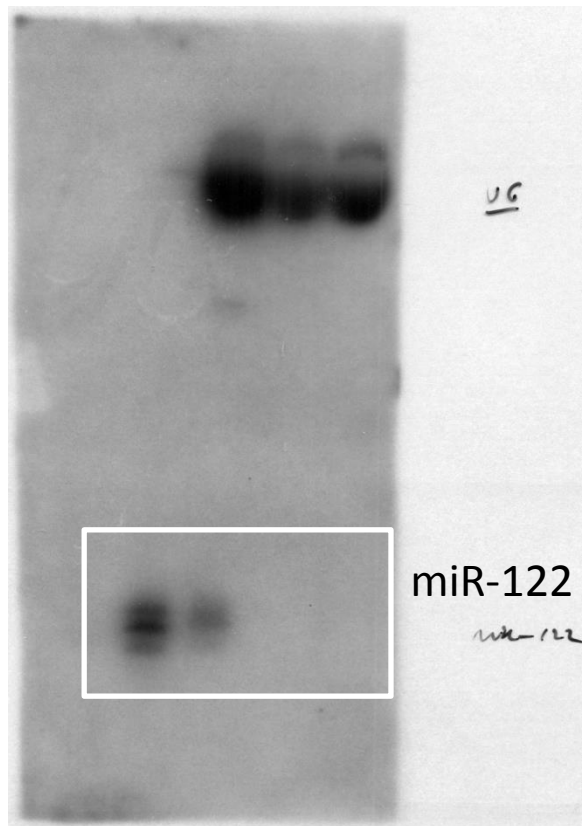

Fig 5b.

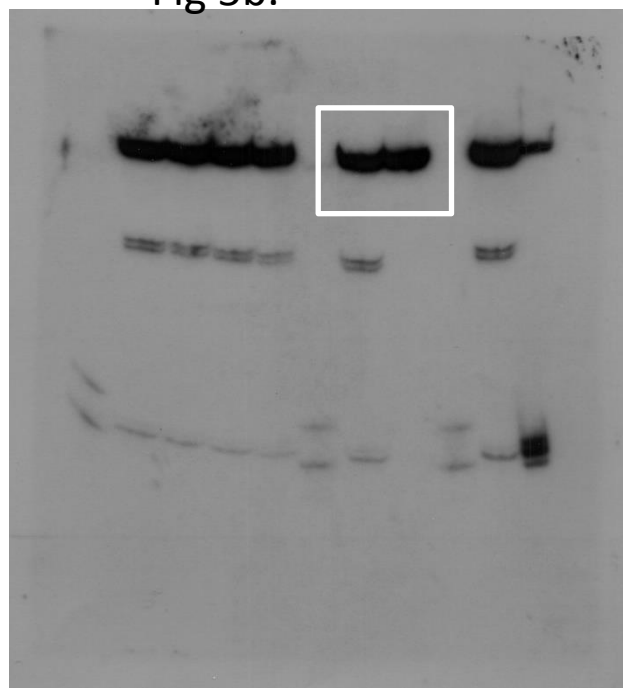

U6 snRNA

Fig 5b.

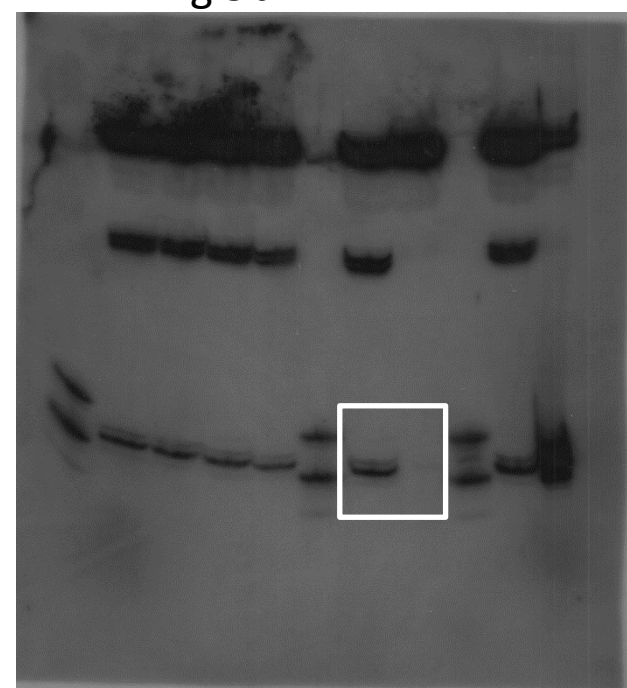

miR-122



Fig 6e

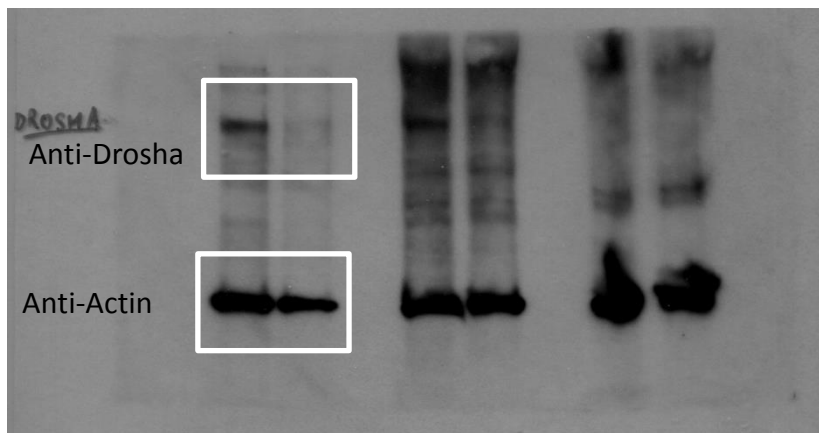

Fig 6e

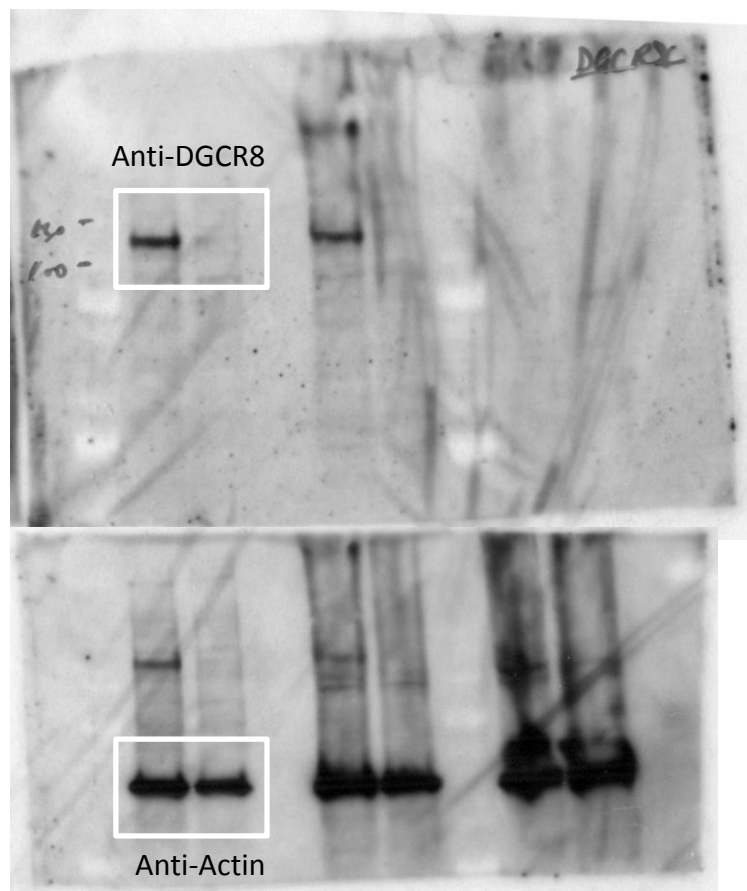



Fig 7f

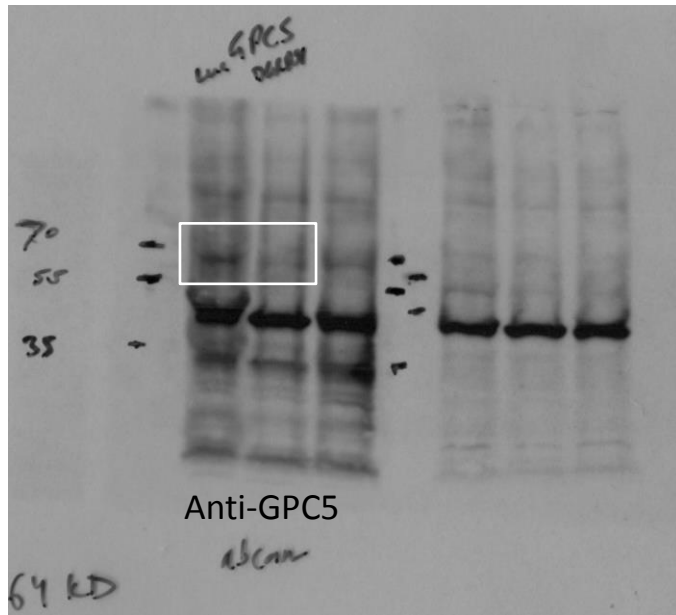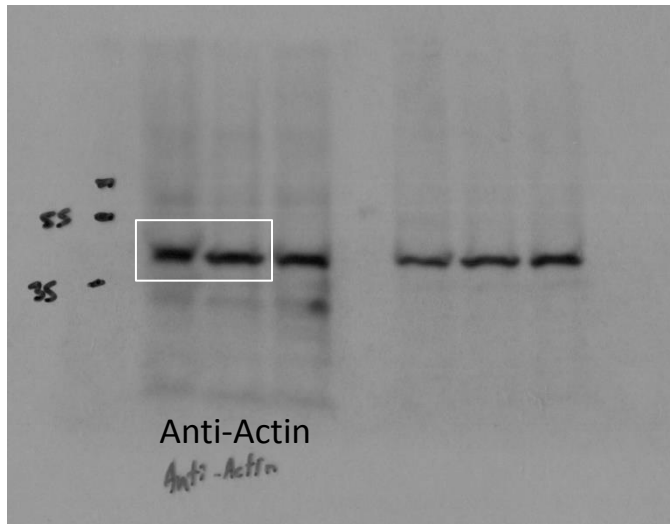

Fig 7f

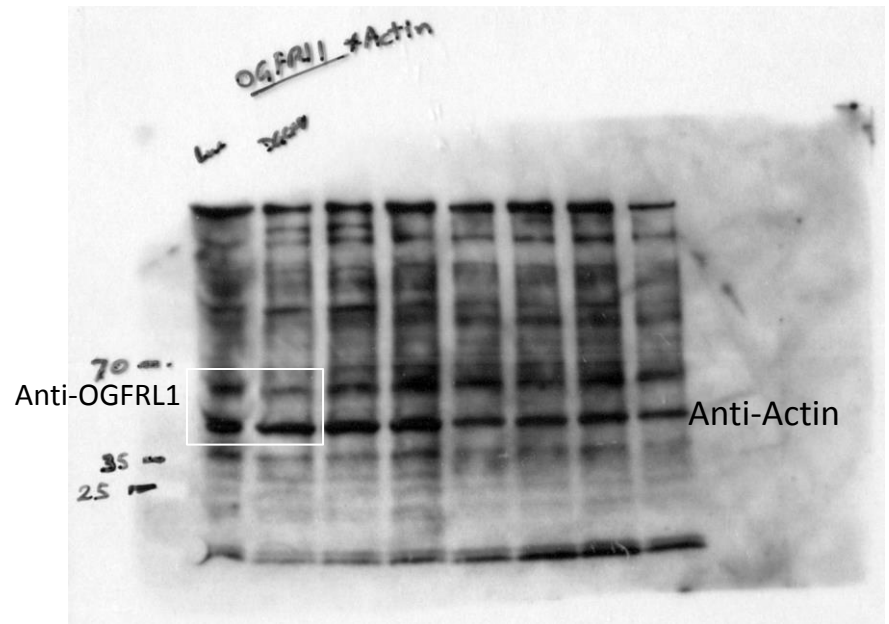



Sup. Fig 5

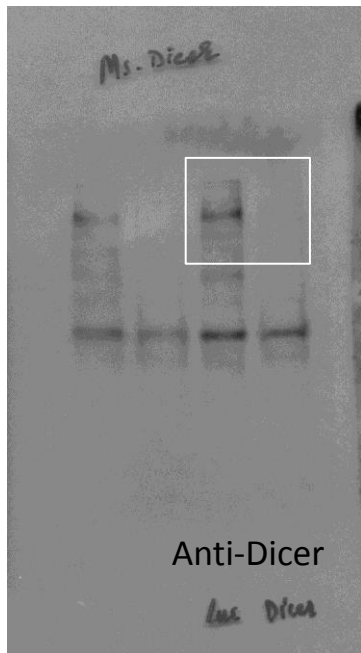

Sup. Fig 5

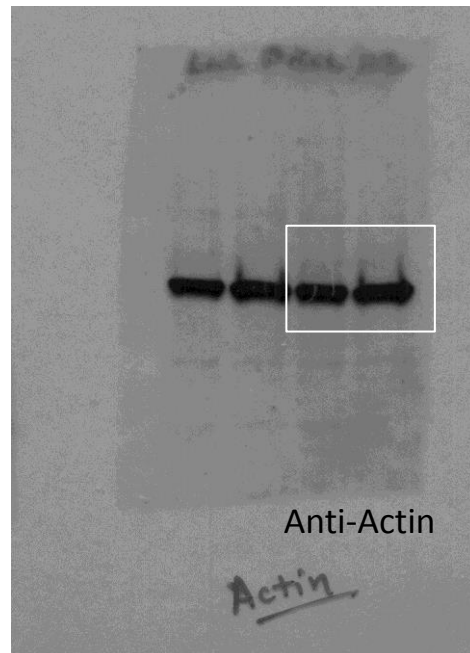

Supplement: NIHMS62161-supplement-data_set.pdf [file NIHMS62161-supplement-data_set.pdf]
