# Supplementary material
Source: PubMed Central journal article supplement (PMC4492989)
Supplement: NIHMS62161-supplement-2.pdf [file NIHMS62161-supplement-2.pdf]

Supplementary Table 1: List of miRNA harbouring lncRNA host genes showing termination defect following Drosha or DGCR8 depletion in HeLa cell line.

| lncRNA host gene     | miRNAs                               | strand | Normalized Read counts (RPKM) |              |             | Fold increase |             | Readthrough  |             |
|----------------------|--------------------------------------|--------|-------------------------------|--------------|-------------|---------------|-------------|--------------|-------------|
|                      |                                      |        | Control siRNA                 | Drosha siRNA | DGCR8 siRNA | Drosha siRNA  | DGCR8 siRNA | Drosha siRNA | DGCR8 siRNA |
| <i>MIR17HG</i>       | hsa-miR-(17~18a~19a~19b-1~20a~92a-1) | (+)    | 57424.66                      | 193251.73    | 339808.14   | 3.37          | 5.92        | YES          | YES         |
| <i>MIR181A2HG</i>    | hsa-miR-(181a-2~181b-2)              | (+)    | 450.27                        | 2687.66      | 4790.68     | 5.97          | 10.64       | YES          | YES         |
| <i>RP11-2B6.3</i>    | hsa-let-(7a-1~7f-1~7d)               | (+)    | 60.04                         | 433.49       | 9390.42     | 7.22          | 156.41      | YES          | YES         |
| <i>RP11-631N16.2</i> | hsa-let-7i                           | (+)    | 6211.77                       | 13798.26     | 70840.17    | 2.22          | 11.40       | YES          | YES         |
| <i>LINC00478</i>     | hsa-miR-(99a~let-7c~125b-2)          | (+)    | 1891.14                       | 4306.04      | 6127.20     | 2.28          | 3.24        | YES          | YES         |
| <i>MIR181A1HG</i>    | hsa-miR-(181a-1~181b-1)              | (-)    | 630.38                        | 82826.30     | 112737.08   | 131.39        | 178.84      | YES          | YES         |
| <i>LOC646329</i>     | hsa-miR-(29a~29b-1)                  | (-)    | 6393.86                       | 148211.68    | 223252.40   | 23.18         | 34.92       | YES          | YES         |
| <i>MIR31HG</i>       | hsa-miR-31                           | (-)    | 2401.45                       | 25821.81     | 26817.37    | 10.75         | 11.17       | YES          | YES         |
| <i>LINC00472</i>     | hsa-miR-(30a~30c-2)                  | (-)    | 14648.84                      | 74459.86     | 114837.34   | 5.08          | 7.84        | YES          | YES         |
| <i>MIR100HG</i>      | hsa-miR-(100~125b-1~let-7a-2)        | (-)    | 4007.42                       | 22772.90     | 31538.61    | 5.68          | 7.87        | YES          | YES         |
| <i>DLEU2</i>         | hsa-miR-(15a~16-1)                   | (-)    | 26145.78                      | 93620.31     | 62868.93    | 3.58          | 2.40        | YES          | YES         |
| <i>MIRLET7BHG</i>    | hsa-let-(7a-3~7b)                    | (+)    | 410.31                        | 609.19       | 494.30      | 1.48          | 1.20        | NO           | NO          |
| <i>LOC284454</i>     | hsa-miR-23a~24-2~27a                 | (-)    | 2716.64                       | 4739.54      | 5884.20     | 1.74          | 2.17        | NO           | NO          |
| <i>MIR22HG</i>       | hsa-miR-22                           | (-)    | 120.07                        | 187.85       | 69.43       | 1.56          | 0.58        | NO           | NO          |
| <i>MIR600HG</i>      | hsa-miR-600                          | (-)    | 1921.16                       | 2239.72      | 1701.04     | 1.17          | 0.89        | NO           | NO          |

RPKM fold increase  $\geq 2$  is considered as genes showing readthrough.

Shaded region in the table highlights lncRNA host genes that do not show termination defect following Drosha or DGCR8 depletion

Supplementary Table 2: List of miRNA harbouring lncRNA host genes showing termination defect following DGCR8 depletion in Huh7 cell line.

| lncRNA host gene        | miRNAs                               | strand | Normalized read counts (RPKM) |             | Fold increase | Readthrough |
|-------------------------|--------------------------------------|--------|-------------------------------|-------------|---------------|-------------|
|                         |                                      |        | Control siRNA                 | DGCR8 siRNA | DGCR8 siRNA   | DGCR8 siRNA |
| <b>MIR17HG</b>          | hsa-miR-(17~18a~19a~19b-1~20a~92a-1) | (+)    | 16404.90                      | 72189.92    | 4.40          | YES         |
| <b>MIR181A2HG</b>       | hsa-miR-(181a-2~181b-2)              | (+)    | 810.49                        | 8748.19     | 10.79         | YES         |
| <b>RP11-2B6.3</b>       | hsa-let-(7a-1~7f-1~7d)               | (+)    | 435.26                        | 5901.56     | 13.56         | YES         |
| <b>MIR146A</b>          | hsa-miR-(146a~3142)                  | (+)    | 1335.81                       | 19336.27557 | 14.48         | YES         |
| <b>RP11-65J21.3</b>     | hsa-miR-(193b~365a)                  | (+)    | 1651.00                       | 7862.96     | 4.76          | YES         |
| <b>RP11-631N16.2</b>    | hsa-let-7i                           | (+)    | 3347.02                       | 12445.34    | 3.72          | YES         |
| <b>AP000662.4</b>       | hsa-miR-130a                         | (+)    | 4012.84                       | 9425.13     | 2.35          | YES         |
| <b>lnc-pri-miR-122*</b> | hsa-miR-122                          | (+)    | 18556.81                      | 41382.39    | 2.23          | YES         |
| <b>MIR940</b>           | hsa-miR-(940~3677)                   | (+)    | 60.04                         | 121.50      | 2.02          | YES         |
| <b>MIR181A1HG</b>       | hsa-miR-(181a-1~181b-1)              | (-)    | 120.07                        | 20915.81    | 174.19        | YES         |
| <b>LOC646329</b>        | hsa-miR-(29a~29b-1)                  | (-)    | 2671.61                       | 63840.95    | 23.90         | YES         |
| <b>AB429224</b>         | hsa-miR-194-2                        | (-)    | 285.17                        | 2395.34     | 8.40          | YES         |
| <b>MIR137HG</b>         | hsa-miR-(137~2682)                   | (-)    | 450.27                        | 2655.70     | 5.90          | YES         |
| <b>AC034220.3</b>       | hsa-miR-3936                         | (-)    | 120.07                        | 624.87      | 5.20          | YES         |
| <b>MIR210HG</b>         | hsa-miR-210                          | (-)    | 300.18                        | 1128.24     | 3.76          | YES         |
| <b>DLEU2</b>            | hsa-miR-(15a~16-1)                   | (-)    | 24629.87                      | 83472.31    | 3.39          | YES         |
| <b>LINC00472</b>        | hsa-miR-(30a~30c-2)                  | (-)    | 645.39                        | 1614.25     | 2.50          | YES         |
| <b>MIRLET7BHG</b>       | hsa-let-(7a-3~7b)                    | (+)    | 14.65                         | 22.43       | 1.53          | NO          |
| <b>LINC00478</b>        | hsa-miR-(99a~let-7c~125b-2)          | (+)    | 420.25                        | 833.16      | 1.98          | NO          |
| <b>MIR22HG</b>          | hsa-miR-22                           | (-)    | 255.15                        | 433.94      | 1.70          | NO          |
| <b>LOC284454</b>        | hsa-miR-23a~24-2~27a                 | (-)    | 615.37                        | 1041.45     | 1.69          | NO          |
| <b>MIR600HG</b>         | hsa-miR-600                          | (-)    | 2341.41                       | 2655.70     | 1.13          | NO          |
| <b>MIR100HG</b>         | hsa-miR-(100~125b-1~let-7a-2)        | (-)    | 2401.45                       | 2082.90     | 0.87          | NO          |

RPKM fold increase  $\geq 2$  is considered as genes showing readthrough.

Shaded region in the table highlights lncRNA host genes that do not show termination defect following DGCR8 depletion.

Genes expressed in both HeLa and Huh7 cell lines are highlighted in bold.

\*Based on our data: Readthrough calculated over chromosomal region (chr18:56120306-56130306) due to lack of available gene annotation.

Supplementary Table 3: Polyadenylation status of miRNA harbouring lncRNA host genes in control vs DGCR8 depleted HeLa cells.

| LncRNA host gene     | Control siRNA |          |             |              | DGCR8 siRNA |          |             |              |
|----------------------|---------------|----------|-------------|--------------|-------------|----------|-------------|--------------|
|                      | BPKM pA-      | BPKM pA+ | Fold change | polyA status | BPKM pA-    | BPKM pA+ | Fold change | polyA status |
| <i>MIR17HG</i>       | 21.37         | 1.89     | 11.31       | pA-          | 43.69       | 5.80     | 7.53        | pA-          |
| <i>MIR181A2HG</i>    | 3.24          | 0.49     | 6.59        | pA-          | 4.25        | 1.03     | 4.12        | pA-          |
| <i>RP11-2B6.3</i>    | 3.37          | 0.37     | 9.03        | pA-          | 7.3         | 0.95     | 7.70        | pA-          |
| <i>RP11-631N16.2</i> | 6.12          | 1.03     | 5.91        | pA-          | 13.35       | 2.66     | 5.02        | pA-          |
| <i>LINC00478</i>     | 1.46          | 0.17     | 8.45        | pA-          | 2.17        | 0.32     | 6.78        | pA-          |
| <i>MIR181A1HG</i>    | 1.07          | 0.07     | 10.31       | pA-          | 3.2         | 0.45     | 7.04        | pA-          |
| <i>LOC646329</i>     | 2.02          | 0.5      | 4.00        | pA-          | 10.6        | 2.96     | 3.58        | pA-          |
| <i>MIR31HG</i>       | 4.18          | 0.51     | 8.12        | pA-          | 6.95        | 1.22     | 5.68        | pA-          |
| <i>LINC00472</i>     | 7.65          | 1.02     | 7.62        | pA-          | 22.9        | 3.81     | 6.01        | pA-          |
| <i>MIR100HG</i>      | 1.59          | 0.27     | 5.93        | pA-          | 7.58        | 1.26     | 6.04        | pA-          |
| <i>DLEU2</i>         | 2.27          | 0.58     | 3.93        | pA-          | 3.2         | 0.97     | 3.28        | pA-          |
| <i>MIRLET7BHG</i>    | 9.36          | 3.67     | 2.55        | pA-          | 20.07       | 57.29    | 0.35        | pA+          |
| <i>LOC284454</i>     | 15.49         | 46.46    | 0.33        | pA+          | 19.96       | 69.89    | 0.29        | pA+          |
| <i>MIR22HG</i>       | 6.05          | 1.58     | 3.82        | pA-          | 9.82        | 7.27     | 1.35        | bimorphic    |
| <i>MIR600HG</i>      | 1.41          | 1.12     | 1.26        | bimorphic    | 1.73        | 1.38     | 1.26        | bimorphic    |

Shaded region in the table highlights lncRNA host genes that do not show termination defect following Drosha or DGCR8 depletion.

**Criteria for polyA status:**

pA-: Fold change values  $\geq 2$

pA+: Fold change values  $\leq 0.5$

Bimorphic: Fold change values between 0.5 and 2

Supplementary Table 4: Gene length and distance of pre-miRNA from TSS in lnc-pri-miRNAs showing Microprocessor mediated transcription termination in (a) HeLa and (b) Huh7 cells. c. Genomic distribution of pre-miRNAs in lncRNA host genes showing Microprocessor mediated transcription termination in HeLa and Huh7 cells.

**a**

| lncRNA host gene     | Gene length | Distance from TSS † |
|----------------------|-------------|---------------------|
| <i>MIR17HG</i>       | 6759        | 2785                |
| <i>MIR181A2HG</i>    | 40164       | 33975               |
| <i>LINC00478</i>     | 556874      | 468567              |
| <i>RP11-2B6.3</i>    | 34338       | 9668                |
| <i>RP11-631N16.2</i> | 11323       | 934                 |
| <i>LINC00472</i>     | 76425       | 32616               |
| <i>LOC646329</i>     | 39660       | 4255                |
| <i>MIR181A1HG</i>    | 129936      | 51380               |
| <i>DLEU2</i>         | 98587       | 21840               |
| <i>MIR31HG</i>       | 104027      | 56473               |
| <i>MIR100HG</i>      | 113959      | 10654               |

**b**

| lncRNA host gene            | Gene length | Distance from TSS † |
|-----------------------------|-------------|---------------------|
| <i>MIR210HG</i>             | 2797        | 2429                |
| <i>AB429224</i>             | 4987        | 2893                |
| <i>MIR940</i>               | 5263        | 2558                |
| <b><i>MIR17HG</i></b>       | 6759        | 2785                |
| <b><i>RP11-631N16.2</i></b> | 11323       | 934                 |
| <i>AP000662.4</i>           | 14766       | 3174                |
| <i>MIR146A</i>              | 19158       | 6134                |
| <i>RP11-65J21.3</i>         | 24065       | 1679                |
| <b><i>RP11-2B6.3</i></b>    | 34338       | 9668                |
| <b><i>LOC646329</i></b>     | 39660       | 4255                |
| <b><i>MIR181A2HG</i></b>    | 40164       | 33975               |
| <i>AC034220.3</i>           | 58630       | 54204               |
| <i>MIR137HG</i>             | 61863       | 57242               |
| <b><i>LINC00472</i></b>     | 76425       | 32616               |
| <b><i>DLEU2</i></b>         | 98587       | 21840               |
| <b><i>MIR181A1HG</i></b>    | 129936      | 51380               |

† For miRNAs in a cluster, distance is calculated from the TSS to the first miRNA. All distances are calculated in nucleotides.

**c**

| Cell line | Genomic location of pre-miRNAs |                   |
|-----------|--------------------------------|-------------------|
|           | Introns                        | Exons (Last exon) |
| HeLa      | 81%                            | 19% (19%)         |
| Huh7      | 74.3%                          | 25.7% (18%)       |

SupplementaryTable 5: RNA-seq mapping statistics.

| Sample ID            | RNA-seq   | Cell | Read size (nt) | Number of PE reads | Mapped PE reads | % of mapped PE reads |
|----------------------|-----------|------|----------------|--------------------|-----------------|----------------------|
| Control siRNA        | Chromatin | HeLa | 51             | 38343118           | 33313212        | 86.88%               |
| DGCR8 siRNA          | Chromatin | HeLa | 51             | 33569636           | 28805961        | 85.81%               |
| Drosha siRNA         | Chromatin | HeLa | 51             | 38989688           | 34602536        | 88.75%               |
| Dicer siRNA          | Chromatin | HeLa | 51             | 17923502           | 12819860        | 71.53%               |
| Control siRNA        | Chromatin | Huh7 | 100            | 20678124           | 18305816        | 88.53%               |
| DGCR8 siRNA          | Chromatin | Huh7 | 100            | 25042908           | 21524505        | 85.95%               |
| Control siRNA polyA+ | Nuclear   | HeLa | 100            | 22919390           | 15798545        | 68.93%               |
| Control siRNA polyA- | Nuclear   | HeLa | 100            | 21002155           | 14045951        | 66.88%               |
| DGCR8 siRNA polyA+   | Nuclear   | HeLa | 100            | 24108556           | 16607260        | 68.89%               |
| DGCR8 siRNA polyA-   | Nuclear   | HeLa | 100            | 25086373           | 17768424        | 70.83%               |

PE denotes paired end

Supplementary Table 6: Oligonucleotide primers and siRNAs used in study

| Primer (qPCR)                                          | Gene            | Sequence (5'-3')                                  |
|--------------------------------------------------------|-----------------|---------------------------------------------------|
| EX1 (spliced) forward                                  | lnc-pri-miR-122 | CAGAAGCTGTGGAAGGCGC                               |
| EX2 (spliced) reverse                                  | lnc-pri-miR-122 | GAAACAGTGAGAGGTGAACAATTCA                         |
| INT1 (unspliced) forward                               | lnc-pri-miR-122 | TGCCACTCAGCACAGCACTA                              |
| INT1 (unspliced) reverse                               | lnc-pri-miR-122 | TGAACCCATCCTGCTCATA                               |
| GAPDH mRNA forward                                     | GAPDH           | AAGGTGAAGGTCCGAGTCAA                              |
| GAPDH mRNA reverse                                     | GAPDH           | AATGAAGGGGTCATTGATGG                              |
| U6 snRNA forward                                       | U6 snRNA        | CTCGCTTCGGCAGCACACA                               |
| U6 snRNA reverse                                       | U6 snRNA        | AACGCTTCACGAATTTGCGT                              |
| EXON2 forward                                          | lnc-pri-miR-122 | ACATGCCTGTGTCCACTGCT                              |
| EXON2 reverse                                          | lnc-pri-miR-122 | CTCTAGGTGGCCCCAGTCAC                              |
| TSS forward                                            | lnc-pri-miR-122 | TTTGACCAAAGGTGGTGCTG                              |
| TSS reverse                                            | lnc-pri-miR-122 | TTAGGCCTCTCCCCTCTCC                               |
| MIR122 forward                                         | lnc-pri-miR-122 | CCCGTGATGCTTCTTTTCTC                              |
| MIR122 reverse                                         | lnc-pri-miR-122 | CCATTGTCCACTCCACAGC                               |
| MIR+2.5kb forward                                      | lnc-pri-miR-122 | GGACTGGTCTTCCATGCTC                               |
| MIR+2.5kb reverse                                      | lnc-pri-miR-122 | AAACGAATCCAGGCAGCAAT                              |
| MIR+4.5kb forward                                      | lnc-pri-miR-122 | CATTCACTCCTGCACGCATT                              |
| MIR+4.5kb reverse                                      | lnc-pri-miR-122 | GGTTCTGGGGAGAGCATCAC                              |
| MIR+7.5kb forward                                      | lnc-pri-miR-122 | GCAACTGAAGCAGCATCGTT                              |
| MIR+7.5kb reverse                                      | lnc-pri-miR-122 | CACGGGGGAGCTTTTCTCTT                              |
| INT1 forward                                           | GAPDH           | CCCCTTCATACCCTCACGTA                              |
| INT1 reverse                                           | GAPDH           | GACAAGCTTCCCGTTCTCAG                              |
| PAS forward                                            | GAPDH           | CTGAATCTCCCCTCCTCACA                              |
| PAS reverse                                            | GAPDH           | TGCCCCAGACCCTAGAATAA                              |
| PAS+1.1kb forward                                      | GAPDH           | TCCAGCCTAGGCAACAGAGT                              |
| PAS+1.1kb reverse                                      | GAPDH           | TGTGCACTTTGGTGCTACTG                              |
| Exon1 forward                                          | GPC5            | TCGGCTAGGGAAGAAGACCA                              |
| Exon1 reverse                                          | GPC5            | GCAGTTAGCTCTTCCCGGAG                              |
| -2kb GPC5 forward                                      | GPC5            | TGACCTCCCACCTGTTTTGT                              |
| -2kb GPC5 reverse                                      | GPC5            | AACGGTGTGTCTTGCAAGGA                              |
| exon1-2 forward                                        | GPC5            | GAAACTTTTCCAGTGGCGGC                              |
| exon1-2 reverse                                        | GPC5            | CTCCTCCATCTTCTGGTGC                               |
| exon3-4 forward                                        | OGFRL1          | TCCATTCAAGCCAGATGGTGT                             |
| exon3-4 reverse                                        | OGFRL1          | AGTGTGGTTGTGCTCCAGTT                              |
| <b>Primer (PCR-Gel)</b>                                | <b>Gene</b>     | <b>Sequence (5'-3')</b>                           |
| exon2 (Total) forward                                  | lnc-pri-miR-122 | GGTGAAGAGGTGAGAGTTGGA                             |
| exon2 (Total) reverse                                  | lnc-pri-miR-122 | CAGCAAACCCCTTCTGCAA                               |
| EX1 (spliced) forward                                  | lnc-pri-miR-122 | CAGAAGCTGTGGAAGGCGC                               |
| EX2 (spliced) reverse                                  | lnc-pri-miR-122 | GAAACAGTGAGAGGTGAACAATTCA                         |
| INT1 (unspliced) forward                               | lnc-pri-miR-122 | ACAACCTGGGCTCAAGGGATC                             |
| INT1 (unspliced) reverse                               | lnc-pri-miR-122 | TCTGTTTAGCTTCCCTGGGC                              |
| GAPDH mRNA forward                                     | GAPDH           | AAGGTGAAGGTCCGAGTCAA                              |
| GAPDH mRNA reverse                                     | GAPDH           | AATGAAGGGGTCATTGATGG                              |
| fwd1 (3' end mapping)                                  | lnc-pri-miR-122 | CCCGTGATGCTTCTTTTCTC                              |
| Linker (3' end mapping)                                |                 | GCTGTCAACGATACGCTACGTAACG                         |
| 3'RACE-(dT) <sub>24</sub> V                            |                 | GCTGTCAACGATACGCTACGTAACG(T) <sub>24</sub> V      |
| Anti-miR-122 (Northern blot)                           |                 | AACACCAUUGUCACACUCCAUA (RNA oligo)                |
| <b>siRNA</b>                                           | <b>Gene</b>     | <b>siRNA Forward Strand</b>                       |
| Control                                                | Luciferase      | GAUUUAGUCCGGUUUUGUAUU                             |
| DGCR8                                                  | DGCR8           | CAUCGGACAAGAGUGUGAU.dTdT                          |
| Drosha                                                 | Drosha          | CGAGUAGGCUUCGUGACUU.dTdT                          |
| CPSF73                                                 | CPSF3           | ON-TARGETPLUS SMARTPOOL<br>CAT NO. L-006365-01    |
| Dicer                                                  | Dicer           | UGCUUGAAGCAGCUCUGG.dTdT                           |
| <b>Primers for pri-miR-122 cloning and mutagenesis</b> |                 | <b>Sequence (5'-3')</b>                           |
| Open_Beta qR                                           |                 | AGCTTTATTGAGGCTTAAGC                              |
| B10 qF                                                 |                 | CAGGAAACTATTACTCAAAGGG                            |
| Pri122 qF                                              |                 | CAGAAGCTGTGGAAGGCGC                               |
| Pri122 qR                                              |                 | ACTGTGTTCTCTGCTGCCTC                              |
| DELTA mir qF                                           |                 | GTTTCCTTAGCAGAGCTGCAATCCTTCCCTCGATAA              |
| DELTA mir qR                                           |                 | TTATCGAGGGAAGGATTGCAGCTCTGCTAAGGAAAC              |
| pA1MTqF                                                |                 | CAATCTTGTGTACTTACTGAAGAAAGTCTGGCTCTTTTGCA<br>CT   |
| pA1MTqR                                                |                 | AGTGCAAAAGAGCCAGACTTTTCTTTCAGTAAGTACACAAGAT<br>TG |
